# Supplementary material for: Assessment of genetic conservation units of an endangered glacial relict insular species, Amentotaxus formosana, based on fine-scale genetic structures of multiple fragmented mountainous populations in Taiwan
Source: Front Plant Sci. 2025 Jan 16;15:1512914. doi: 10.3389/fpls.2024.1512914 (PMC11779735; doi:10.3389/fpls.2024.1512914)
Supplement: Supplementary file 1 [file DataSheet1.xlsx]

## Sheet: SSR raw data
Supplementary Material Raw Data Sheet S1 Raw data of 678 samples from Amentotaxus formosana populations in Taiwan based on amplicon sizes using 15 SSR loci.
code	poppopulation	Am-3mer-5		Am-3mer-14		Am-3mer-114		Am-3mer-124		Am-3mer-197		Am-3mer-239		Am-3mer-143		Am-3mer-118		Am-3mer-71A		Am-3mer-117		Am-3mer-71B		Am-3mer-16		Am-2mer-1-60		Am-2mer-1-96		Am-2mer-7-9
1	Cha-1	204	196	254	254	268	268	214	214	302	302	288	280	228	228	308	308	200	200	258	258	214	214	342	358	0	0	0	0	0	0
3	Cha-1	204	196	254	254	270	270	216	216	302	302	288	280	228	228	308	308	200	200	238	258	212	212	340	358	280	280	268	280	230	230
5	Cha-1	204	196	254	250	270	270	214	214	304	304	290	282	230	230	308	308	198	198	238	258	212	212	340	340	260	260	266	280	230	244
7	Cha-1	206	198	254	254	270	270	214	214	300	300	288	280	230	230	310	310	200	200	238	238	212	212	342	342	282	282	266	280	230	244
9	Cha-1	204	196	290	254	270	270	212	212	306	306	288	280	228	228	312	312	200	200	238	258	214	214	340	358	266	280	280	290	236	236
14	Cha-1	204	196	254	254	270	270	214	214	308	308	288	280	228	228	304	304	198	198	234	256	212	212	342	360	280	380	254	266	230	244
16	Cha-1	204	196	254	254	268	268	214	214	304	304	288	280	228	228	310	310	200	200	238	258	214	214	342	358	268	282	280	290	240	240
17	Cha-1	204	196	254	254	268	268	216	216	304	304	288	280	230	230	304	304	200	200	238	258	212	212	340	358	282	282	254	266	230	230
18	Cha-1	204	196	254	254	270	270	214	214	304	304	288	280	228	228	310	310	200	200	234	256	214	214	340	358	0	0	0	0	0	0
20	Cha-1	196	196	0	0	268	268	216	216	302	302	298	290	230	230	310	310	200	200	238	238	214	214	342	342	266	280	266	280	228	242
22	Cha-1	204	204	254	254	270	270	214	214	310	310	288	280	228	228	312	312	200	200	238	258	214	214	342	358	282	282	266	280	236	236
25	Cha-1	206	198	254	254	270	270	214	214	304	304	282	282	230	230	308	308	200	200	238	238	214	214	342	358	266	266	278	290	240	240
27	Cha-1	204	196	254	254	270	270	214	214	310	310	286	278	228	228	312	312	200	200	238	258	214	214	342	358	280	280	254	268	236	248
28	Cha-1	204	196	254	254	270	270	214	214	302	302	288	280	230	230	312	312	200	200	238	258	214	214	342	358	266	280	266	280	236	236
35	Cha-1	204	196	254	254	270	270	216	216	304	304	290	282	230	230	304	304	200	200	238	258	212	212	340	358	280	280	280	290	236	248
36	Cha-1	204	196	254	254	270	270	214	214	310	310	288	280	228	228	308	308	200	200	234	256	214	214	342	360	280	280	266	280	230	244
38	Cha-1	204	196	254	254	270	270	214	214	300	300	290	282	228	228	302	302	200	200	238	258	212	212	340	358	260	280	278	280	236	248
39	Cha-1	204	196	254	254	268	268	214	214	302	302	288	280	228	228	310	310	200	200	238	258	212	212	340	358	266	280	278	290	230	230
41	Cha-1	204	196	254	254	270	270	214	214	304	304	288	280	228	228	310	310	200	200	234	256	212	212	340	358	266	282	268	280	236	236
42	Cha-1	204	196	254	254	270	270	214	214	304	304	288	280	228	228	304	304	200	200	238	258	212	212	340	358	260	280	266	280	236	236
43	Cha-1	204	196	254	254	270	270	214	214	302	302	288	280	228	228	310	310	200	200	238	258	212	212	340	358	268	280	268	268	236	236
44	Cha-1	204	196	254	254	268	268	214	214	302	302	288	280	228	228	304	304	200	200	238	258	214	214	340	358	266	266	266	280	236	248
53	Cha-1	204	196	254	254	270	270	214	214	304	304	286	278	228	228	310	310	200	200	238	258	214	214	342	342	282	282	254	266	236	236
54	Cha-1	204	196	254	254	270	270	214	214	302	302	288	280	228	228	310	310	200	200	238	258	214	214	344	344	260	280	254	268	230	242
59	Cha-1	204	196	254	254	270	270	214	214	304	304	288	280	226	226	304	304	200	200	238	258	212	212	342	360	260	280	266	280	236	248
61	Cha-1	204	196	288	252	270	270	214	214	300	300	288	280	226	226	304	304	200	200	258	258	212	212	342	360	260	280	268	280	236	236
67	Cha-1	204	196	254	254	270	270	214	214	310	310	286	278	228	228	312	312	200	200	0	0	214	214	342	342	280	280	268	268	236	236
69	Cha-1	206	198	254	254	270	270	216	216	300	300	288	280	228	228	308	308	200	200	238	258	212	212	342	358	280	280	280	280	234	244
74	Cha-1	204	196	254	254	268	268	216	216	304	304	290	282	230	230	304	304	200	200	238	258	212	212	340	358	282	282	266	280	236	248
75	Cha-1	204	196	254	254	270	270	214	214	302	302	290	282	228	228	310	310	200	200	238	258	214	214	342	358	268	282	280	290	230	230
77	Cha-1	204	196	254	254	270	270	214	214	308	308	288	280	228	228	304	304	198	198	234	256	212	212	340	340	266	266	260	268	230	230
78	Cha-1	204	196	254	254	270	270	216	216	304	304	288	280	230	230	302	302	198	198	234	256	212	212	340	358	280	280	278	290	230	244
80	Cha-1	204	196	254	254	268	268	214	214	304	304	288	280	228	228	308	308	200	200	234	256	214	214	340	358	266	266	278	290	236	248
81	Cha-1	204	196	254	254	268	268	212	212	300	300	288	280	228	228	310	310	200	200	232	252	212	212	340	340	260	280	278	278	240	250
83	Cha-1	204	196	254	254	270	270	214	214	306	306	288	280	230	230	304	304	200	200	234	234	212	212	340	358	266	280	278	280	236	248
86	Cha-1	204	196	254	254	268	268	216	216	304	304	290	282	228	228	304	304	200	200	238	258	212	212	342	342	268	282	266	280	236	248
87	Cha-1	204	196	254	254	270	270	214	214	310	310	286	278	228	228	310	310	200	200	0	0	214	214	342	342	280	280	268	280	236	236
91	Cha-1	204	196	254	254	270	270	214	214	306	306	290	282	228	228	310	310	0	0	238	258	214	214	342	358	0	0	0	0	0	0
94	Cha-1	204	196	254	254	268	268	216	216	306	306	288	280	230	230	304	304	200	200	234	256	212	212	340	358	266	282	278	278	230	230
95	Cha-1	204	196	252	252	270	270	214	214	306	306	288	280	228	228	304	304	200	200	238	238	212	212	342	360	280	280	278	278	240	250
103	Cha-1	204	196	254	254	268	268	212	212	304	304	288	280	230	230	304	304	200	200	232	252	212	212	342	342	266	280	254	266	240	240
106	Cha-1	204	196	254	254	268	268	216	216	302	302	288	280	228	228	304	304	200	200	238	258	212	212	340	340	266	266	278	290	230	230
107	Cha-1	204	196	254	254	268	268	214	214	302	302	288	280	230	230	308	308	200	200	232	252	212	212	340	358	280	280	280	290	240	250
108	Cha-1	204	196	254	254	268	268	214	214	304	304	288	280	228	228	310	310	200	200	232	252	212	212	342	358	0	0	0	0	0	0
109	Cha-1	204	196	254	254	268	268	216	216	304	304	288	280	230	230	304	304	200	200	234	256	212	212	340	358	266	280	278	278	236	248
154	Cha-1	204	196	254	254	270	270	214	214	302	302	290	282	228	228	310	310	200	200	238	258	214	214	342	342	280	280	266	280	234	246
158	Cha-1	204	204	254	254	272	272	214	214	304	304	0	0	230	230	312	312	200	200	234	256	214	214	340	358	268	280	280	290	236	248
201	Cha-1	204	196	254	254	270	270	214	214	306	306	288	280	228	228	304	304	200	200	238	258	214	214	342	360	260	276	278	278	240	236
202	Cha-1	204	196	254	254	268	268	214	214	302	302	290	282	230	230	302	302	200	200	238	258	212	212	342	342	0	0	0	0	0	0
203	Cha-1	204	196	256	256	270	270	214	214	306	306	288	280	228	228	310	310	200	200	238	258	214	214	342	342	260	280	280	290	236	248
204	Cha-1	204	196	254	254	270	270	214	214	304	304	288	280	228	228	310	310	200	200	238	258	214	214	342	358	268	280	278	290	236	248
205	Cha-1	204	196	252	252	270	270	214	214	300	300	288	280	228	228	310	310	200	200	232	252	212	212	342	358	282	282	268	280	0	0
206	Cha-1	204	196	254	254	268	268	214	214	300	300	288	280	230	230	302	302	200	200	232	252	212	212	340	358	268	280	266	280	236	236
209	Cha-1	204	196	254	254	270	270	214	214	304	304	290	282	228	228	302	302	200	200	238	258	214	214	342	358	260	268	280	280	230	242
213	Cha-1	204	204	254	254	270	270	214	214	302	302	290	282	228	228	308	308	198	198	238	258	214	214	342	358	268	280	280	290	236	236
216	Cha-1	204	196	0	0	270	270	216	216	308	308	290	282	230	230	310	310	198	198	238	238	214	214	342	342	280	280	278	278	236	236
221	Cha-1	0	0	0	0	0	0	0	0	0	0	0	0	0	0	0	0	0	0	238	238	0	0	340	358	266	282	268	280	236	236
222	Cha-1	204	196	254	254	272	272	214	214	310	310	288	280	230	230	302	302	200	200	238	258	214	214	342	360	280	280	280	280	230	244
223	Cha-1	206	198	254	254	270	270	216	216	310	310	0	0	228	228	302	302	200	200	238	258	214	214	342	358	268	280	268	280	236	236
224	Cha-1	204	196	0	0	270	270	214	214	302	302	0	0	230	230	310	310	200	200	238	238	214	214	340	340	0	0	0	0	0	0
231	Cha-1	204	196	254	254	270	270	212	212	302	302	288	280	228	228	310	310	200	200	232	252	212	212	340	340	266	280	278	290	240	240
252	Cha-1	204	196	254	250	270	270	216	216	306	306	290	282	230	230	308	308	198	198	238	258	214	214	340	358	280	280	266	280	234	244
253	Cha-1	204	196	254	254	270	270	214	214	304	304	290	282	230	230	310	310	200	200	238	238	212	212	340	358	260	280	280	280	236	248
263	Cha-1	204	196	254	254	270	270	214	214	306	306	288	280	228	228	312	312	200	200	238	258	214	214	342	358	268	280	280	290	230	230
351	Cha-1	204	196	254	254	270	270	214	214	306	306	288	288	228	228	312	312	200	200	238	258	214	214	342	342	266	280	268	280	230	236
352	Cha-1	206	198	254	254	270	270	216	216	300	300	288	280	228	228	308	308	200	200	238	258	214	214	342	342	282	282	266	280	236	236
354	Cha-1	204	196	254	254	270	270	212	212	310	310	288	280	228	228	310	310	200	200	238	258	214	214	342	342	266	280	278	290	236	236
356	Cha-1	204	204	254	254	270	270	212	212	300	300	0	0	230	230	304	304	200	200	238	238	214	214	342	358	268	280	268	280	240	240
357	Cha-1	204	196	254	254	270	270	214	214	300	300	288	280	280	280	312	312	200	200	240	240	214	214	342	342	268	282	266	278	228	242
666	Cha-1	204	196	254	254	270	270	214	214	304	304	288	280	228	228	312	312	200	200	238	238	214	214	342	358	0	0	268	280	236	236
745	Cha-1	204	196	252	252	270	270	214	214	304	304	288	280	228	228	312	312	200	200	238	258	214	214	342	342	268	280	266	280	0	0
746	Cha-1	204	196	254	254	268	268	214	214	304	304	288	280	230	230	308	308	200	200	238	258	212	212	342	358	266	266	268	280	240	240
747	Cha-1	204	196	252	252	268	268	214	214	302	302	286	286	228	228	312	312	200	200	232	252	212	212	340	340	282	282	278	290	240	250
748	Cha-1	204	196	254	254	270	270	216	216	302	302	286	278	228	228	308	308	200	200	238	258	212	212	340	358	266	280	0	0	230	230
749	Cha-1	204	204	254	254	270	270	216	216	302	302	288	280	228	228	302	302	200	200	256	256	214	214	340	358	0	0	266	268	230	230
790	Cha-1	204	204	254	254	270	270	214	214	304	304	288	280	228	228	302	302	200	200	258	258	214	214	342	358	0	0	0	0	0	0
791	Cha-1	204	196	290	254	272	272	214	214	300	300	0	0	228	228	308	308	200	200	256	256	212	212	0	0	260	276	268	280	236	248
792	Cha-1	204	196	252	252	272	272	214	214	300	300	290	282	228	228	302	302	200	200	238	238	212	212	342	358	0	0	0	0	0	0
794	Cha-1	204	196	254	254	270	270	216	216	306	306	290	282	230	230	304	304	200	200	234	256	212	212	340	340	268	280	266	280	236	248
795	Cha-1	204	204	290	254	272	272	216	216	300	300	290	282	230	230	304	304	200	200	0	0	212	212	342	358	266	282	266	280	236	248
796	Cha-1	204	196	254	254	270	270	216	216	300	300	290	282	228	228	302	302	200	200	238	258	214	214	342	358	268	280	278	290	236	248
798	Cha-1	204	196	254	250	270	270	216	216	308	308	288	280	228	228	310	310	200	200	238	258	214	214	340	358	268	276	280	280	236	248
162	Cha-2	204	204	254	254	272	272	214	214	302	302	288	280	228	228	302	302	200	200	238	238	212	212	342	342	266	280	278	290	230	244
167	Cha-2	204	196	254	254	270	270	214	214	304	304	290	282	230	230	308	312	198	198	234	234	214	214	342	358	266	266	266	280	236	236
168	Cha-2	204	196	254	254	268	268	214	214	302	302	288	280	228	228	308	308	200	200	238	238	212	212	342	342	266	280	266	280	236	248
169	Cha-2	204	196	254	254	268	268	214	214	302	302	290	282	228	228	308	308	200	200	238	238	212	212	342	358	0	0	260	280	0	0
171	Cha-2	204	204	254	254	268	268	216	216	302	302	290	282	228	228	308	308	200	200	234	234	212	212	342	358	0	0	268	268	236	236
173	Cha-2	204	196	254	254	270	270	214	214	306	306	290	282	230	230	308	312	198	198	232	232	214	214	342	342	260	276	268	268	230	244
176	Cha-2	204	204	252	252	268	268	214	214	302	302	290	282	230	230	308	312	198	198	232	232	214	214	342	342	280	280	268	268	230	244
177	Cha-2	204	196	254	254	268	268	214	214	300	300	290	282	230	230	308	312	198	198	232	232	214	214	342	342	260	276	266	266	230	230
178	Cha-2	204	196	254	254	268	268	214	214	302	302	290	282	230	230	308	312	198	198	232	232	214	214	342	358	280	280	266	266	234	244
180	Cha-2	204	196	290	254	270	270	214	214	302	302	290	282	230	230	302	308	200	200	238	238	212	212	342	358	268	280	266	266	236	236
181	Cha-2	204	204	254	254	268	268	214	214	300	300	288	280	226	226	302	308	198	198	232	232	212	212	342	358	266	266	266	280	236	248
182	Cha-2	204	196	252	252	270	270	214	214	304	304	290	282	228	228	302	308	200	200	238	238	212	212	342	342	266	266	278	290	230	230
184	Cha-2	204	196	252	252	268	268	214	214	302	302	288	280	228	228	308	308	198	198	232	232	212	212	342	358	276	276	266	280	230	230
186	Cha-2	204	204	254	254	268	268	216	216	302	302	290	282	230	230	308	308	198	198	234	234	212	212	340	340	266	266	254	266	230	230
234	Cha-2	204	196	252	252	268	268	216	216	302	302	290	282	228	228	302	308	200	200	234	234	212	212	342	358	280	280	268	268	236	248
236	Cha-2	204	196	290	254	268	268	214	214	302	302	288	280	230	230	308	308	198	198	234	234	212	212	340	358	0	0	0	0	0	0
237	Cha-2	204	204	254	254	268	268	214	214	304	304	288	280	230	230	308	308	198	198	238	238	214	214	342	358	268	282	278	290	236	248
238	Cha-2	204	196	290	254	270	270	214	214	306	306	290	282	230	230	308	308	200	200	238	238	212	212	342	358	0	0	268	268	230	230
240	Cha-2	204	196	254	254	268	268	214	214	302	302	288	288	230	230	312	312	198	198	232	232	214	214	342	358	266	280	260	278	0	0
241	Cha-2	204	196	254	254	270	270	214	214	304	304	288	280	230	230	308	308	198	198	238	238	214	214	342	358	280	280	278	290	236	248
242	Cha-2	204	196	254	254	268	268	216	216	304	304	290	282	230	230	308	308	198	198	234	234	212	212	342	358	260	280	268	268	236	236
243	Cha-2	204	204	290	254	272	272	214	214	306	306	290	282	228	228	310	312	198	198	238	238	0	0	342	342	266	276	268	290	236	248
244	Cha-2	204	196	254	254	270	270	212	212	308	308	290	282	230	230	310	310	200	200	238	238	0	0	338	338	268	268	268	280	236	236
245	Cha-2	204	196	254	254	270	270	214	214	304	304	288	280	228	228	308	308	198	198	234	234	212	212	340	340	260	260	266	280	236	236
246	Cha-2	204	196	288	252	272	272	214	214	300	300	290	282	0	0	308	312	198	198	238	238	214	214	342	358	0	0	266	266	236	248
247	Cha-2	204	196	252	252	268	268	216	216	304	304	288	280	228	228	0	0	198	198	232	232	212	212	342	358	260	260	254	266	230	230
248	Cha-2	204	196	252	252	268	268	214	214	302	302	288	280	226	226	308	308	198	198	232	232	212	212	340	358	266	276	266	266	236	248
301	Cha-2	204	204	290	252	268	268	214	214	302	302	288	280	228	228	308	308	198	198	232	232	212	212	340	358	266	280	266	266	236	236
359	Cha-2	204	196	252	252	268	268	214	214	302	302	288	280	228	228	302	308	198	198	232	232	212	212	340	358	266	280	266	280	236	248
360	Cha-2	204	204	254	254	268	268	214	214	302	302	290	282	230	230	308	308	200	200	238	238	212	212	342	358	280	280	266	280	230	230
361	Cha-2	204	204	252	252	270	270	214	214	304	304	288	280	228	228	312	312	200	200	234	234	214	214	342	358	280	280	268	268	236	236
362	Cha-2	204	196	254	254	270	270	214	214	302	302	290	290	230	230	312	312	198	198	238	238	214	214	342	342	276	276	268	280	234	244
363	Cha-2	204	196	288	252	270	270	214	214	302	302	290	282	230	230	302	308	200	200	238	238	212	212	342	358	268	280	268	268	230	230
364	Cha-2	204	204	252	252	270	270	214	214	304	304	288	280	228	228	312	312	198	198	238	238	214	214	338	338	268	280	266	280	236	236
365	Cha-2	204	204	254	254	268	268	214	214	302	302	290	282	228	228	308	308	200	200	234	234	212	212	342	358	268	280	268	290	236	248
366	Cha-2	204	196	250	250	268	268	214	214	300	300	288	280	228	228	302	308	200	200	234	234	212	212	342	358	0	0	268	268	236	236
367	Cha-2	204	196	290	252	268	268	214	214	302	302	288	280	228	228	308	308	198	198	232	232	212	212	342	358	266	276	268	268	236	236
368	Cha-2	204	196	252	252	268	268	214	214	302	302	288	280	228	228	308	308	198	198	232	232	212	212	342	358	276	276	266	266	236	248
369	Cha-2	204	204	254	254	268	268	216	216	300	300	290	282	228	228	302	308	200	200	238	238	214	214	342	358	280	280	268	290	236	236
370	Cha-2	204	196	252	252	270	270	214	214	302	302	290	282	230	230	308	308	200	200	238	238	212	212	342	358	280	280	266	266	236	248
371	Cha-2	204	196	254	254	270	270	212	212	306	306	290	282	230	230	304	310	198	198	238	238	212	212	342	342	0	0	266	266	230	244
372	Cha-2	204	196	254	254	268	268	214	214	302	302	288	280	228	228	308	308	200	200	238	238	212	212	342	358	266	276	268	290	230	244
373	Cha-2	204	204	290	254	270	270	214	214	300	300	288	280	228	228	302	308	200	200	238	238	212	212	342	342	266	280	278	290	230	230
374	Cha-2	204	196	254	254	268	268	214	214	302	302	290	282	228	228	308	308	200	200	238	238	212	212	342	358	268	280	268	290	236	248
375	Cha-2	204	196	288	254	268	268	216	216	304	304	290	282	230	230	312	312	198	198	234	234	214	214	342	358	266	280	266	280	230	244
376	Cha-2	204	196	254	254	270	270	212	212	304	304	290	282	230	230	310	310	200	200	238	238	212	212	342	342	266	266	278	278	230	244
377	Cha-2	204	196	254	254	268	268	216	216	302	302	290	282	230	230	0	0	200	200	234	234	212	212	340	358	280	280	266	266	230	230
378	Cha-2	204	196	252	252	270	270	214	214	306	306	288	280	228	228	302	302	198	198	238	238	214	214	338	338	0	0	266	266	236	248
379	Cha-2	204	196	254	254	270	270	214	214	306	306	290	282	230	230	308	312	198	198	234	234	214	214	340	358	266	266	266	280	236	236
381	Cha-2	204	196	252	252	268	268	214	214	304	304	288	280	228	228	302	308	200	200	232	232	212	212	342	358	260	276	266	266	236	236
382	Cha-2	204	204	254	254	266	266	214	214	300	300	290	282	230	230	312	312	200	200	232	232	214	214	342	358	0	0	260	280	234	244
383	Cha-2	204	196	254	254	266	266	214	214	306	306	290	282	228	228	308	312	198	198	232	232	214	214	340	358	268	268	266	280	236	236
384	Cha-2	204	196	252	252	268	268	214	214	304	304	288	280	230	230	312	312	200	200	234	234	214	214	342	358	0	0	266	266	236	236
385	Cha-2	0	0	0	0	0	0	0	0	0	0	0	0	0	0	308	308	0	0	0	0	0	0	342	358	0	0	0	0	0	0
386	Cha-2	204	196	290	254	270	270	214	214	306	306	288	280	230	230	308	312	200	200	238	238	214	214	342	342	268	282	268	290	236	248
163	Cha-3	204	204	290	254	270	270	214	214	304	304	290	282	228	228	310	310	200	200	234	234	214	214	342	342	0	0	266	290	0	0
165	Cha-3	204	196	252	252	268	268	216	216	302	302	0	0	230	230	308	308	200	200	238	238	214	214	338	338	0	0	0	0	228	228
166	Cha-3	204	196	254	254	314	270	214	214	302	302	0	0	228	228	308	308	200	200	238	238	214	214	338	338	266	276	266	278	230	244
175	Cha-3	204	204	254	254	270	270	216	216	304	304	290	282	230	230	310	310	200	200	256	256	214	214	338	338	260	280	268	280	236	248
195	Cha-3	204	204	252	252	268	268	216	216	304	304	290	282	230	230	310	310	200	200	238	258	214	214	342	358	260	260	268	290	236	248
197	Cha-3	204	204	254	254	270	270	212	212	304	304	288	278	230	230	308	308	200	200	232	252	214	214	340	340	0	0	0	0	230	244
277	Cha-3	204	196	290	254	268	268	216	216	302	302	288	280	230	230	304	304	200	200	238	238	212	212	342	358	268	268	268	290	236	248
279	Cha-3	204	196	252	252	270	270	216	216	302	302	288	280	230	230	302	302	200	200	232	232	214	214	340	358	266	280	268	290	236	248
280	Cha-3	204	196	254	254	272	272	216	216	302	302	286	278	230	230	304	304	200	200	232	232	214	214	340	340	0	0	0	0	0	0
285	Cha-3	196	196	252	252	270	270	212	212	306	306	288	278	230	230	308	308	200	200	232	232	214	214	342	358	266	280	278	290	230	230
289	Cha-3	204	196	252	252	268	268	216	216	300	300	290	282	0	0	308	308	198	198	232	232	214	214	340	340	0	0	0	0	0	0
290	Cha-3	206	198	290	254	270	270	216	216	302	302	290	282	230	230	308	308	200	200	234	234	214	214	342	358	0	0	268	290	236	248
291	Cha-3	206	198	252	252	268	268	214	214	304	304	290	282	230	230	308	308	200	200	232	252	214	214	340	340	264	266	268	290	236	236
292	Cha-3	204	196	254	254	270	270	216	216	302	302	290	282	228	228	308	308	200	200	232	232	214	214	342	358	276	280	268	290	236	248
293	Cha-3	204	204	254	254	268	268	216	216	304	304	282	282	230	230	304	304	200	200	238	238	214	214	342	358	0	0	268	280	230	244
294	Cha-3	206	198	288	252	270	270	216	216	302	302	290	282	230	230	308	308	200	200	232	232	214	214	342	342	268	280	268	280	236	248
295	Cha-3	204	204	254	254	272	272	216	216	302	302	286	286	230	230	304	304	198	198	232	232	214	214	358	358	260	260	254	266	234	248
296	Cha-3	204	196	290	254	268	268	216	216	302	302	290	282	230	230	304	304	0	0	238	238	212	212	342	358	268	280	268	290	236	248
297	Cha-3	204	196	254	254	268	268	216	216	298	298	290	282	230	230	308	308	200	200	234	234	214	214	340	358	260	260	280	290	230	230
299	Cha-3	204	196	254	254	270	270	214	214	302	302	288	280	228	228	308	308	200	200	232	232	214	214	340	358	260	266	268	280	236	248
302	Cha-3	204	204	252	252	268	268	212	212	304	304	288	278	230	230	310	310	200	200	232	232	214	214	340	358	276	276	278	290	230	244
309	Cha-3	204	196	254	254	268	268	216	216	302	302	288	280	230	230	304	304	200	200	238	238	214	214	340	358	260	260	268	290	236	248
311	Cha-3	204	196	252	252	268	268	214	214	302	302	288	280	228	228	308	308	200	200	232	232	214	214	342	358	282	282	266	280	230	230
313	Cha-3	204	196	290	254	270	270	216	216	302	302	290	282	228	228	310	310	200	200	234	234	214	214	342	358	266	266	280	280	230	244
314	Cha-3	204	196	252	252	270	270	216	216	302	302	290	282	228	228	310	310	200	200	234	234	214	214	342	358	266	266	290	290	236	248
315	Cha-3	206	198	252	252	270	270	214	214	304	304	290	282	230	230	310	310	200	200	232	252	214	214	342	358	266	280	254	266	230	230
320	Cha-3	204	196	254	254	268	268	214	214	304	304	288	280	226	226	308	308	200	200	232	252	214	214	340	340	280	280	268	268	236	248
321	Cha-3	204	196	254	254	268	268	214	214	302	302	288	280	226	226	308	308	200	200	232	232	214	214	342	342	260	280	260	260	236	248
323	Cha-3	204	204	252	252	270	270	212	212	302	302	290	282	230	230	310	310	200	200	232	252	214	214	340	358	280	280	278	290	0	0
324	Cha-3	204	204	252	252	270	270	212	212	302	302	290	282	230	230	310	310	200	200	232	252	214	214	340	358	260	276	266	280	236	248
326	Cha-3	204	204	252	252	268	268	214	214	304	304	290	282	228	228	308	308	200	200	238	238	214	214	342	358	0	0	280	290	0	0
327	Cha-3	204	196	252	252	272	272	216	216	302	302	288	280	230	230	304	304	200	200	232	232	214	214	340	358	0	0	280	296	234	248
328	Cha-3	204	196	288	252	270	270	216	216	0	0	290	282	0	0	304	304	200	200	238	238	214	214	342	358	0	0	0	0	0	0
330	Cha-3	204	196	252	252	268	268	214	214	304	304	290	282	228	228	308	308	198	198	238	238	214	214	342	358	276	276	268	280	230	244
331	Cha-3	204	196	288	252	270	270	212	212	302	302	290	282	230	230	310	310	200	200	232	232	214	214	340	358	266	280	280	290	236	248
332	Cha-3	204	196	254	254	266	266	212	212	304	304	288	280	230	230	312	312	198	198	232	232	214	214	342	342	0	0	260	260	236	236
333	Cha-3	204	196	254	254	262	262	212	212	304	304	288	280	230	230	310	310	198	198	232	232	214	214	342	342	266	282	268	284	236	236
338	Cha-3	204	196	254	254	262	262	212	212	302	302	288	280	228	228	310	310	198	198	232	232	214	214	342	358	266	266	266	280	240	250
339	Cha-3	204	196	252	252	268	268	216	216	302	302	290	282	230	230	308	308	198	198	238	238	214	214	342	358	260	280	278	290	236	236
341	Cha-3	204	196	252	252	270	270	216	216	302	302	290	282	0	0	308	308	198	198	234	234	214	214	340	340	266	266	260	278	230	244
346	Cha-3	204	196	252	252	268	268	216	216	302	302	290	282	230	230	304	304	198	198	234	234	214	214	342	342	260	260	278	290	230	244
347	Cha-3	204	196	254	254	272	272	216	216	304	304	290	282	228	228	310	310	200	200	234	234	214	214	338	338	282	282	268	268	230	244
348	Cha-3	204	204	252	252	270	270	214	214	304	304	288	278	230	230	308	308	200	200	232	232	214	214	340	358	280	280	268	280	234	248
349	Cha-3	206	198	288	252	270	270	214	214	304	304	290	282	230	230	310	310	200	200	234	234	214	214	342	342	280	280	278	290	236	248
350	Cha-3	204	204	0	0	270	270	216	216	302	302	282	282	230	230	302	302	200	200	238	238	214	214	342	358	260	260	280	280	234	248
388	Cha-3	204	196	254	254	266	266	212	212	302	302	290	290	230	230	308	308	198	198	234	234	214	214	358	358	0	0	280	280	230	244
389	Cha-3	204	196	254	254	266	266	212	212	302	302	290	282	228	228	310	310	200	200	232	232	214	214	340	340	266	280	266	280	230	244
390	Cha-3	204	196	254	254	266	266	214	214	302	302	290	282	228	228	310	310	200	200	232	232	214	214	340	340	266	280	266	280	230	230
391	Cha-3	204	204	254	254	266	266	216	216	302	302	290	282	228	228	310	310	200	200	234	256	214	214	342	358	266	280	266	280	230	244
395	Cha-3	204	204	254	254	268	268	212	212	302	302	288	280	228	228	310	310	200	200	232	232	214	214	340	358	266	280	278	290	236	248
396	Cha-3	204	204	0	0	0	0	216	216	302	302	0	0	230	230	304	304	200	200	238	258	214	214	0	0	276	280	266	278	228	228
397	Cha-3	0	0	252	252	270	270	214	214	302	302	290	282	228	228	308	308	200	200	238	238	214	214	340	358	260	260	268	280	236	236
398	Cha-3	0	0	288	252	270	270	0	0	300	300	0	0	0	0	0	0	198	198	256	256	214	214	0	0	0	0	0	0	0	0
399	Cha-3	204	196	252	252	268	268	214	214	304	304	290	282	228	228	308	308	200	200	238	238	214	214	342	342	266	266	280	280	236	248
400	Cha-3	204	204	252	252	270	270	214	214	302	302	288	280	230	230	308	308	200	200	232	232	214	214	342	358	266	280	278	290	236	248
401	Cha-3	204	204	254	254	268	268	214	214	302	302	288	280	226	226	308	308	200	200	232	252	214	214	342	342	0	0	268	280	234	234
403	Cha-3	204	204	288	252	270	270	214	214	302	302	0	0	230	230	308	308	200	200	238	238	214	214	0	0	276	276	278	290	230	244
404	Cha-3	204	196	254	254	268	268	216	216	302	302	288	280	226	226	308	308	200	200	232	232	214	214	340	340	266	280	268	280	236	236
405	Cha-3	206	198	254	254	268	268	214	214	304	304	290	282	230	230	308	308	200	200	232	232	214	214	340	340	0	0	0	0	230	244
410	Cha-3	204	196	254	254	270	270	214	214	302	302	288	280	228	228	308	308	200	200	232	232	214	214	340	340	260	276	268	290	244	254
413	Cha-3	206	198	252	252	268	268	214	214	304	304	290	282	230	230	308	308	200	200	232	232	214	214	340	340	266	282	278	278	240	250
414	Cha-3	206	198	254	254	270	270	216	216	302	302	290	282	228	228	310	310	200	200	234	234	214	214	342	342	266	280	268	268	230	230
416	Cha-3	206	198	254	254	272	272	216	216	304	304	288	280	228	228	308	308	200	200	234	234	214	214	342	358	266	280	268	268	240	250
417	Cha-3	204	196	252	252	268	268	214	214	302	302	288	280	228	228	308	308	200	200	232	232	214	214	342	358	260	276	268	290	236	248
418	Cha-3	204	196	254	254	270	270	216	216	302	302	286	278	230	230	304	304	200	200	238	238	214	214	340	340	266	280	280	290	230	244
419	Cha-3	204	196	252	252	270	270	214	214	302	302	286	278	230	230	308	308	200	200	232	232	214	214	340	340	276	276	280	296	230	244
420	Cha-3	204	196	254	254	268	268	216	216	302	302	288	280	230	230	304	304	198	198	238	238	214	214	340	340	260	260	278	280	236	248
452	Cha-3	204	196	252	252	270	270	214	214	302	302	288	280	228	228	308	308	200	200	232	232	214	214	342	358	260	260	266	266	230	244
453	Cha-3	204	196	252	252	270	270	214	214	302	302	288	280	230	230	308	308	200	200	234	234	214	214	358	358	260	260	280	280	230	230
454	Cha-3	204	196	254	254	268	268	216	216	304	304	290	282	228	228	308	308	200	200	232	232	214	214	342	358	260	276	260	278	236	248
456	Cha-3	206	198	254	254	268	268	216	216	302	302	290	282	228	228	308	308	200	200	234	234	214	214	342	358	0	0	278	290	240	250
457	Cha-3	198	198	0	0	270	270	216	216	302	302	284	284	230	230	310	310	200	200	234	234	214	214	342	358	282	282	266	266	230	230
458	Cha-3	204	196	254	254	268	268	216	216	300	300	290	282	230	230	304	304	198	198	234	234	214	214	340	358	268	282	254	266	230	244
459	Cha-3	204	204	254	254	272	272	216	216	300	300	0	0	0	0	310	310	200	200	238	258	214	214	338	338	276	276	266	280	230	244
460	Cha-3	204	196	290	254	268	268	216	216	300	300	290	282	0	0	304	304	200	200	234	256	214	214	342	358	276	276	266	280	234	248
461	Cha-3	204	196	252	252	268	268	216	216	304	304	290	282	228	228	308	308	200	200	238	238	214	214	342	342	266	266	268	280	228	242
463	Cha-3	206	198	254	254	270	270	216	216	302	302	290	282	230	230	310	310	200	200	232	232	214	214	342	342	266	266	260	278	236	248
464	Cha-3	196	196	254	254	268	268	214	214	304	304	288	280	0	0	308	308	200	200	232	232	214	214	342	358	0	0	0	0	236	248
466	Cha-3	204	196	252	252	270	270	214	214	302	302	288	280	230	230	308	308	200	200	232	232	214	214	340	340	0	0	0	0	0	0
467	Cha-3	204	196	254	254	268	268	214	214	304	304	288	280	226	226	308	308	200	200	232	252	214	214	340	358	0	0	260	278	236	248
469	Cha-3	204	204	254	254	270	270	216	216	302	302	290	282	230	230	304	304	198	198	238	238	214	214	338	338	280	280	280	280	228	242
470	Cha-3	204	196	252	252	268	268	216	216	306	302	288	280	230	230	304	304	200	200	238	258	214	214	340	358	280	280	278	290	236	248
472	Cha-3	204	204	254	254	270	270	214	214	300	300	282	282	230	230	308	308	200	200	238	238	214	214	340	358	276	276	266	280	0	0
631	Cha-3	204	204	254	254	270	270	214	214	302	302	288	280	228	228	308	308	200	200	238	238	214	214	338	338	282	282	266	280	236	248
641	Cha-3	204	196	254	254	270	270	214	214	300	300	290	282	230	230	310	310	200	200	238	238	214	214	340	358	260	260	266	280	230	230
642	Cha-3	204	196	252	252	268	268	214	214	300	300	290	290	228	228	308	308	200	200	232	232	214	214	342	342	0	0	260	266	230	244
643	Cha-3	204	196	254	254	270	270	212	212	302	302	290	282	230	230	310	310	200	200	232	232	214	214	342	358	282	282	246	254	230	230
644	Cha-3	204	196	254	254	270	270	216	216	306	302	286	278	230	230	304	304	200	200	238	238	214	214	360	360	0	0	0	0	230	244
645	Cha-3	204	196	252	252	268	268	212	212	300	300	280	280	230	230	308	308	200	200	238	238	214	214	342	358	0	0	254	268	230	244
647	Cha-3	204	204	254	254	270	270	212	212	302	302	290	282	230	230	308	308	200	200	232	232	214	214	340	358	282	282	246	254	236	236
649	Cha-3	204	204	254	254	270	270	212	212	302	302	290	282	230	230	310	310	200	200	256	256	214	214	340	358	282	282	266	280	236	248
422	Cha-4	204	196	252	252	268	268	214	214	302	302	286	278	230	230	304	304	200	200	234	256	214	214	340	340	276	276	0	0	236	248
423	Cha-4	204	196	254	254	270	270	214	214	302	302	288	288	230	230	308	308	200	200	234	256	214	214	342	358	268	276	266	280	230	230
424	Cha-4	204	196	254	254	270	270	214	214	298	298	286	278	230	230	310	310	200	200	232	252	214	214	340	358	276	276	0	0	230	230
425	Cha-4	204	196	254	254	266	266	216	216	302	302	288	280	230	230	308	308	200	200	234	234	214	214	340	340	276	276	0	0	230	236
426	Cha-4	204	196	252	252	270	270	214	214	302	302	290	282	228	228	308	308	200	200	234	234	212	212	342	342	0	0	0	0	0	0
427	Cha-4	204	196	252	252	268	268	216	216	300	300	288	280	230	230	310	310	200	200	234	256	214	214	342	342	266	276	266	280	236	248
428	Cha-4	204	196	254	254	270	270	216	216	300	300	290	282	228	228	304	304	200	200	234	256	214	214	342	358	276	280	268	280	236	236
430	Cha-4	204	196	254	254	268	268	216	216	298	298	0	0	230	230	310	310	200	200	234	256	212	212	342	342	266	276	268	290	230	230
431	Cha-4	204	196	254	254	268	268	214	214	302	302	286	286	230	230	310	310	200	200	232	252	212	212	342	342	276	276	268	280	230	230
432	Cha-4	204	196	254	254	270	270	214	214	300	300	286	278	230	230	304	304	200	200	232	252	214	214	342	342	276	276	260	268	234	234
433	Cha-4	204	196	254	254	268	268	212	212	300	300	290	282	230	230	308	308	200	200	234	256	214	214	340	358	276	276	268	268	236	236
434	Cha-4	204	196	254	254	0	0	214	214	300	300	286	278	230	230	308	308	200	200	232	232	214	214	342	342	276	276	0	0	236	248
435	Cha-4	204	196	252	252	268	268	214	214	302	302	286	278	230	230	304	304	200	200	234	256	214	214	342	358	268	268	0	0	230	230
436	Cha-4	192	192	290	254	270	270	216	216	300	300	288	280	230	230	308	308	200	200	256	256	212	212	0	0	276	282	0	0	236	248
437	Cha-4	204	196	252	252	270	270	216	216	300	300	290	282	228	228	308	308	200	200	234	256	214	214	340	358	276	276	266	280	234	248
438	Cha-4	204	196	254	254	268	268	214	214	300	300	286	278	230	230	304	304	200	200	232	252	0	0	342	342	280	280	0	0	234	234
439	Cha-4	204	196	254	254	268	268	214	214	302	302	286	278	0	0	304	304	200	200	232	252	214	214	340	340	0	0	0	0	236	248
440	Cha-4	204	196	254	254	272	272	216	216	300	300	286	278	230	230	310	310	200	200	256	256	214	214	340	340	276	276	260	268	234	244
441	Cha-4	196	196	254	254	270	270	216	216	0	0	0	0	230	230	310	310	200	200	256	256	212	212	340	358	282	282	254	268	230	244
442	Cha-4	204	196	252	252	270	270	216	216	302	302	0	0	230	230	310	310	200	200	234	256	212	212	342	358	280	280	266	266	236	248
443	Cha-4	204	196	252	252	270	270	216	216	300	300	290	282	230	230	308	308	200	200	234	256	214	214	340	358	276	276	268	290	234	234
444	Cha-4	204	196	254	254	268	268	214	214	302	302	286	278	230	230	304	304	202	202	232	252	214	214	342	342	276	276	278	278	234	234
446	Cha-4	204	196	254	254	268	268	214	214	298	298	286	278	230	230	310	310	200	200	232	252	214	214	340	358	276	276	268	290	234	248
449	Cha-4	204	196	252	252	270	270	216	216	300	300	288	288	230	230	304	304	200	200	234	256	214	214	338	356	276	276	0	0	230	230
473	Cha-4	204	196	254	254	270	270	216	216	302	302	288	280	228	228	308	308	200	200	234	234	214	214	340	358	268	268	266	280	234	248
477	Cha-4	204	196	252	252	270	270	214	214	302	302	290	282	228	228	310	310	200	200	234	256	214	214	342	342	280	280	268	280	230	244
479	Cha-4	204	196	0	0	272	272	216	216	302	302	0	0	230	230	0	0	200	200	234	234	214	214	0	0	276	282	260	278	234	244
495	Cha-4	204	196	254	254	270	270	216	216	300	300	290	282	228	228	308	308	200	200	232	232	214	214	342	342	280	280	260	260	234	248
509	Cha-4	204	196	290	252	270	270	214	214	302	302	288	280	230	230	310	310	200	200	234	256	214	214	342	342	280	280	254	268	224	234
511	Cha-4	204	196	252	252	268	268	216	216	302	302	288	280	230	230	310	310	200	200	234	234	214	214	340	340	280	280	266	278	230	244
513	Cha-4	204	204	254	254	268	268	216	216	300	300	290	282	228	228	308	308	198	198	232	232	214	214	340	340	266	280	280	290	236	248
514	Cha-4	204	196	254	254	270	270	216	216	300	300	290	282	0	0	308	308	198	198	234	256	214	214	358	358	266	280	278	278	236	248
530	Cha-4	204	196	254	254	268	268	216	216	300	300	290	282	228	228	304	304	200	200	232	232	214	214	342	342	266	266	268	278	236	248
550	Cha-4	204	196	254	254	268	268	214	214	302	302	286	278	230	230	310	310	200	200	232	252	214	214	342	342	0	0	0	0	0	0
551	Cha-4	204	196	254	254	268	268	216	216	298	298	290	282	230	230	310	310	200	200	0	0	0	0	342	358	0	0	0	0	234	236
552	Cha-4	204	196	252	252	270	270	216	216	298	298	288	280	230	230	308	308	198	198	234	234	214	214	342	342	0	0	260	278	0	0
553	Cha-4	204	196	252	252	270	270	216	216	300	300	290	282	228	228	308	308	200	200	234	256	214	214	340	340	260	276	266	266	234	234
555	Cha-4	204	196	252	252	270	270	216	216	300	300	290	282	228	228	304	304	200	200	234	256	214	214	340	340	0	0	268	290	236	236
561	Cha-4	204	196	252	252	268	268	216	216	300	300	288	280	0	0	308	308	198	198	234	234	214	214	342	342	268	280	268	280	230	244
566	Cha-4	204	196	254	254	268	268	214	214	300	300	286	278	230	230	308	308	200	200	232	232	214	214	342	342	268	268	278	290	230	230
567	Cha-4	204	196	254	254	270	270	216	216	300	300	290	282	0	0	304	304	200	200	234	234	214	214	342	342	276	276	268	268	230	244
568	Cha-4	204	196	254	254	270	270	216	216	302	302	288	280	230	230	308	308	200	200	234	234	214	214	340	340	268	268	260	278	236	236
571	Cha-4	204	196	252	252	270	270	214	214	300	300	0	0	230	230	310	310	200	200	232	252	214	214	338	338	268	276	268	290	230	230
572	Cha-4	204	196	252	252	268	268	214	214	302	302	288	280	230	230	310	310	200	200	234	234	212	212	0	0	268	268	266	280	230	230
573	Cha-4	204	196	252	252	268	268	214	214	300	300	288	288	230	230	308	308	200	200	234	256	214	214	340	358	276	276	246	268	230	244
575	Cha-4	204	196	252	252	268	268	216	216	302	302	286	278	230	230	308	308	198	198	232	252	214	214	340	340	276	276	268	268	230	230
583	Cha-4	204	196	254	254	270	270	216	216	300	300	280	280	0	0	308	308	198	198	234	234	214	214	340	340	266	280	278	278	230	244
585	Cha-4	204	196	252	252	270	270	216	216	302	302	288	280	228	228	308	308	200	200	234	234	214	214	340	340	268	268	0	0	236	248
590	Cha-4	204	196	252	252	270	270	214	214	300	300	288	278	0	0	308	308	200	200	234	234	212	212	340	340	0	0	268	280	0	0
593	Cha-4	204	196	254	254	268	268	216	216	300	300	290	282	228	228	304	304	200	200	232	232	214	214	338	338	286	286	254	278	230	244
596	Cha-4	204	196	252	252	268	268	214	214	302	302	290	282	0	0	310	310	200	200	232	252	214	214	342	342	280	280	278	290	230	244
599	Cha-4	204	196	290	254	0	0	214	214	300	300	286	278	230	230	308	308	200	200	232	252	214	214	340	340	276	276	260	278	236	248
601	Cha-4	204	196	254	254	268	268	216	216	300	300	290	282	228	228	304	304	198	198	232	232	214	214	340	340	0	0	0	0	0	0
605	Cha-4	204	196	254	254	268	268	214	214	300	300	290	282	228	228	304	304	200	200	232	232	214	214	340	340	276	276	268	280	236	236
607	Cha-4	196	196	254	254	270	270	214	214	302	302	290	282	230	230	308	308	200	200	234	234	214	214	340	340	0	0	260	278	228	242
611	Cha-4	204	196	254	254	270	270	216	216	302	302	282	282	230	230	308	308	200	200	234	234	214	214	358	358	276	276	260	268	230	230
622	Cha-4	204	196	254	254	270	270	214	214	302	302	288	278	230	230	308	308	200	200	234	234	214	214	340	340	268	268	266	266	234	234
630	Cha-4	204	196	252	252	268	268	214	214	300	300	286	278	230	230	304	304	200	200	234	256	214	214	342	358	268	268	266	266	230	230
633	Cha-4	204	196	252	252	270	270	216	216	300	300	288	280	230	230	310	310	200	200	234	256	214	214	342	342	260	276	268	268	236	248
634	Cha-4	204	196	254	254	268	268	214	214	304	304	286	286	230	230	302	302	200	200	232	252	214	214	342	358	268	280	268	290	234	248
652	Cha-4	204	196	252	252	270	270	216	216	300	300	290	282	228	228	308	308	200	200	234	256	214	214	342	358	282	282	266	266	234	234
654	Cha-4	204	196	254	254	268	268	212	212	300	300	290	282	230	230	308	308	200	200	234	256	214	214	340	340	0	0	0	0	0	0
657	Cha-4	0	0	252	252	270	270	0	0	0	0	0	0	0	0	0	0	198	198	234	234	214	214	0	0	0	0	0	0	0	0
658	Cha-4	196	196	254	254	268	268	216	216	302	302	290	282	0	0	308	308	200	200	256	256	212	212	342	342	276	276	0	0	236	248
665	Cha-4	204	196	254	254	268	268	214	214	302	302	286	278	230	230	308	308	200	200	232	252	214	214	340	340	0	0	260	280	234	248
667	Cha-4	204	196	252	252	268	268	214	214	302	302	286	278	230	230	310	310	200	200	232	252	212	212	340	340	276	276	268	290	0	0
669	Cha-4	204	196	252	252	266	266	216	216	302	302	286	278	230	230	308	308	200	200	234	256	214	214	0	0	276	276	266	266	228	234
671	Cha-4	204	196	252	252	0	0	216	216	300	300	290	282	228	228	308	308	200	200	234	256	214	214	342	358	276	280	266	278	236	236
673	Cha-4	204	196	254	254	0	0	214	214	300	300	288	280	230	230	308	308	200	200	256	256	214	214	342	342	276	276	268	290	234	248
674	Cha-4	204	196	254	254	268	268	214	214	302	302	286	278	0	0	308	308	200	200	232	252	214	214	338	338	276	276	278	278	234	248
675	Cha-4	196	196	254	254	268	268	214	214	298	298	0	0	230	230	310	310	200	200	256	256	214	214	342	342	0	0	266	266	234	234
677	Cha-4	196	196	254	254	270	270	212	212	0	0	288	280	230	230	310	310	200	200	234	256	214	214	342	342	260	276	268	268	236	248
678	Cha-4	204	196	254	254	268	268	212	212	300	300	286	278	230	230	312	312	200	200	232	252	214	214	342	342	280	280	268	280	236	248
679	Cha-4	204	196	254	254	268	268	214	214	302	302	286	278	230	230	310	310	200	200	232	252	214	214	342	358	266	276	268	290	234	248
682	Cha-4	204	196	252	252	268	268	212	212	302	302	288	280	230	230	310	310	200	200	234	234	212	212	342	342	282	282	268	290	236	248
684	Cha-4	204	196	254	254	268	268	212	212	302	302	286	278	230	230	308	308	200	200	232	232	214	214	340	340	276	276	278	290	236	248
685	Cha-4	204	196	254	254	270	270	216	216	302	302	288	280	228	228	308	308	200	200	234	234	214	214	340	358	268	276	266	280	340	350
686	Cha-4	204	196	252	252	270	270	214	214	300	300	286	278	230	230	308	308	200	200	234	234	214	214	342	342	268	268	0	0	236	248
700	Cha-4	204	196	0	0	266	266	216	216	300	300	288	280	230	230	304	304	200	200	234	256	214	214	342	358	276	280	266	266	234	234
705	Cha-4	192	192	254	254	270	270	216	216	302	302	290	290	230	230	308	308	200	200	0	0	212	212	340	358	276	276	260	260	234	248
706	Cha-4	204	196	254	254	268	268	212	212	300	300	288	280	230	230	308	308	200	200	256	256	214	214	342	342	276	276	278	278	236	248
707	Cha-4	204	204	252	252	0	0	0	0	0	0	0	0	0	0	0	0	198	198	0	0	0	0	0	0	0	0	0	0	0	0
708	Cha-4	0	0	288	254	268	268	0	0	0	0	0	0	230	230	310	310	200	200	256	256	212	212	342	358	280	280	266	280	236	236
711	Cha-4	204	196	252	252	268	268	216	216	300	300	286	278	230	230	304	304	200	200	238	258	214	214	340	358	276	282	260	278	236	248
712	Cha-4	196	196	288	254	270	270	0	0	298	298	0	0	0	0	310	310	200	200	0	0	214	214	342	342	0	0	260	280	236	236
713	Cha-4	204	196	252	252	268	268	216	216	302	302	286	278	230	230	310	310	200	200	234	256	214	214	340	340	276	276	278	290	234	248
716	Cha-4	204	196	254	254	268	268	212	212	300	300	286	278	0	0	304	304	200	200	234	234	214	214	342	342	260	280	278	290	236	236
717	Cha-4	204	204	288	254	268	268	216	216	0	0	0	0	230	230	310	310	200	200	0	0	214	214	342	358	0	0	0	0	236	236
718	Cha-4	204	192	254	254	268	268	214	214	0	0	0	0	230	230	310	310	200	200	256	256	214	214	340	358	0	0	0	0	0	0
719	Cha-4	204	204	288	254	270	270	214	214	0	0	0	0	230	230	310	310	200	200	256	256	214	214	340	358	276	276	278	278	230	230
720	Cha-4	204	204	254	254	270	270	216	216	300	300	290	282	0	0	308	308	200	200	234	234	214	214	340	358	268	268	246	268	230	230
721	Cha-4	204	196	254	254	268	268	214	214	302	302	286	278	0	0	308	308	200	200	232	252	214	214	342	358	0	0	0	0	0	0
722	Cha-4	196	196	288	254	268	268	216	216	302	302	0	0	230	230	310	310	200	200	256	256	214	214	340	358	0	0	0	0	0	0
723	Cha-4	204	196	252	252	268	268	214	214	300	300	290	282	230	230	312	312	200	200	234	234	214	214	340	358	276	276	260	278	228	228
724	Cha-4	204	196	252	252	270	270	214	214	300	300	288	288	230	230	308	308	198	198	234	256	212	212	340	340	282	282	0	0	236	248
801	Cha-4	204	196	254	254	268	268	216	216	300	300	288	280	228	228	304	304	200	200	232	232	214	214	342	342	266	280	260	260	234	248
687	Cha-5	204	204	290	252	268	268	216	216	302	302	290	290	228	228	308	308	200	200	234	234	214	214	358	358	280	280	266	280	234	248
688	Cha-5	204	204	288	252	268	268	214	214	302	302	290	290	228	228	310	310	200	200	234	234	214	214	342	358	280	280	0	0	236	236
689	Cha-5	204	196	254	254	268	268	212	212	302	302	288	280	230	230	308	308	198	198	234	234	212	212	342	358	266	282	260	268	230	242
691	Cha-5	204	196	288	252	268	268	214	214	304	304	290	290	228	228	308	308	200	200	234	234	214	214	358	358	276	276	260	278	230	242
692	Cha-5	204	196	252	252	268	268	216	216	302	302	288	288	230	230	312	312	200	200	234	234	214	214	342	358	280	280	268	290	228	242
693	Cha-5	0	0	290	254	268	268	216	216	298	298	0	0	230	230	304	304	202	202	234	234	212	212	340	358	280	280	260	268	228	242
694	Cha-5	204	196	290	254	270	270	216	216	300	300	290	290	228	228	308	308	200	200	232	232	212	212	342	358	282	282	268	268	236	248
695	Cha-5	204	204	290	254	268	268	216	216	300	300	0	0	228	228	308	308	200	200	234	234	214	214	0	0	282	282	278	290	236	236
696	Cha-5	0	0	254	254	268	268	216	216	298	298	0	0	0	0	308	308	200	200	234	256	214	214	342	358	276	276	260	268	0	0
697	Cha-5	196	196	290	254	0	0	0	0	0	0	0	0	0	0	310	310	0	0	0	0	0	0	0	0	0	0	0	0	230	244
698	Cha-5	0	0	254	254	268	268	216	216	300	300	0	0	230	230	310	310	202	202	234	256	0	0	0	0	0	0	266	280	236	236
725	Cha-5	204	196	290	254	268	268	214	214	304	304	0	0	230	230	308	308	198	198	234	234	214	214	342	358	276	276	268	290	230	242
727	Cha-5	204	204	288	252	268	268	214	214	300	300	288	280	228	228	308	308	200	200	234	234	214	214	342	358	276	276	266	280	230	242
728	Cha-5	204	204	252	252	268	268	216	216	302	302	290	290	228	228	308	308	200	200	234	256	214	214	340	358	280	280	254	278	234	234
729	Cha-5	204	204	252	252	266	266	214	214	302	302	288	288	228	228	308	308	200	200	234	234	214	214	342	358	282	282	266	280	236	236
730	Cha-5	204	196	290	254	268	268	216	216	302	302	290	282	228	228	308	308	198	198	234	234	212	212	342	358	282	282	268	268	230	242
731	Cha-5	204	204	290	254	268	268	216	216	302	302	290	290	228	228	310	310	202	202	0	0	214	214	342	342	280	280	268	280	236	248
733	Cha-5	204	196	290	254	270	270	216	216	302	302	290	290	228	228	308	308	200	200	234	234	212	212	342	358	280	280	268	280	234	246
734	Cha-5	204	196	290	254	268	268	214	214	302	302	288	280	230	230	308	308	200	200	234	234	214	214	342	342	0	0	268	290	0	0
735	Cha-5	204	196	252	252	270	270	214	214	302	302	290	282	230	230	304	304	200	200	238	238	212	212	342	358	280	280	268	290	234	234
736	Cha-5	206	198	254	254	266	266	216	216	300	300	290	282	0	0	312	312	200	200	234	234	214	214	340	340	0	0	0	0	230	244
738	Cha-5	204	196	290	252	268	268	214	214	300	300	290	282	228	228	308	308	200	200	234	234	214	214	342	358	280	280	268	280	236	248
741	Cha-5	204	196	290	254	270	270	214	214	302	302	290	290	230	230	310	310	200	200	238	238	214	214	358	358	276	276	268	290	230	230
742	Cha-5	206	198	254	254	266	266	216	216	302	302	288	280	230	230	308	308	200	200	234	234	214	214	342	358	0	0	0	0	0	0
743	Cha-5	206	198	290	254	270	270	214	214	302	302	290	282	228	228	302	302	200	200	234	234	212	212	342	358	280	280	278	290	0	0
751	Cha-5	204	196	288	252	266	266	214	214	300	300	290	282	228	228	308	308	200	200	234	234	214	214	342	358	280	280	278	290	234	248
752	Cha-5	206	206	252	252	266	266	216	216	304	304	288	280	228	228	304	304	200	200	234	234	212	212	342	358	280	280	260	268	236	248
753	Cha-5	196	196	254	254	266	266	214	214	302	302	290	282	228	228	308	308	200	200	234	234	214	214	342	342	280	280	266	280	0	0
754	Cha-5	204	204	288	252	266	266	214	214	302	302	288	288	228	228	304	304	200	200	234	234	214	214	342	358	282	282	266	280	234	234
756	Cha-5	206	206	290	254	266	266	216	216	300	300	288	288	228	228	308	308	200	200	234	234	214	214	342	358	280	280	268	280	236	236
757	Cha-5	204	196	288	252	268	268	216	216	302	302	288	280	228	228	310	310	200	200	234	234	214	214	342	358	282	282	268	280	236	248
758	Cha-5	196	196	0	0	268	268	214	214	302	302	290	282	230	230	302	302	200	200	238	238	212	212	342	358	280	280	260	278	230	244
759	Cha-5	204	204	290	254	268	268	216	216	302	302	288	288	230	230	304	304	200	200	234	234	214	214	338	356	280	280	260	268	236	248
760	Cha-5	206	206	252	252	266	266	216	216	302	302	288	288	228	228	0	0	200	200	234	234	214	214	342	358	280	280	260	268	236	236
761	Cha-5	204	196	252	252	268	268	214	214	302	302	288	280	230	230	308	308	200	200	234	234	212	212	342	342	280	280	266	280	230	244
762	Cha-5	204	196	290	254	268	268	214	214	300	300	290	290	228	228	308	308	202	202	234	234	214	214	342	358	280	280	266	280	234	248
763	Cha-5	206	198	254	254	268	268	216	216	300	300	288	280	228	228	304	304	200	200	234	234	212	212	340	358	280	280	266	278	236	248
764	Cha-5	204	196	254	254	270	270	214	214	300	300	290	290	230	230	310	310	202	202	234	234	214	214	342	358	0	0	0	0	234	248
765	Cha-5	204	196	288	252	270	270	214	214	304	304	290	282	228	228	304	304	200	200	234	234	212	212	342	358	0	0	0	0	0	0
766	Cha-5	204	204	252	252	268	268	214	214	302	302	290	290	228	228	308	308	0	0	234	234	214	214	340	358	282	282	254	266	228	242
767	Cha-5	204	204	290	254	266	266	216	216	300	300	288	280	228	228	304	304	200	200	234	234	214	214	342	358	280	280	268	280	236	236
768	Cha-5	206	198	252	254	270	270	214	214	300	300	290	290	230	230	304	304	200	200	234	234	212	212	342	358	0	0	0	0	0	0
769	Cha-5	204	204	288	252	268	268	214	214	304	304	290	290	228	228	308	308	200	200	234	234	212	212	340	358	280	280	254	266	236	248
770	Cha-5	204	204	288	252	268	268	214	214	300	300	290	290	228	228	308	308	200	200	234	234	214	214	342	358	276	276	266	280	236	236
771	Cha-5	204	204	252	252	268	268	214	214	304	304	290	290	230	230	308	308	198	198	234	234	214	220	342	358	276	276	260	268	230	242
772	Cha-5	204	196	288	252	268	268	214	214	304	304	288	280	228	228	310	310	200	200	234	234	212	212	342	358	276	276	260	278	236	248
774	Cha-5	196	196	290	254	268	268	0	0	0	0	290	282	230	230	310	310	200	200	234	256	0	0	0	0	282	282	0	0	236	236
776	Cha-5	204	196	288	252	270	270	216	216	300	300	290	282	228	228	308	308	200	200	234	234	212	212	342	342	276	276	0	0	236	236
777	Cha-5	204	196	252	252	270	270	214	214	302	302	290	290	228	228	308	308	200	200	234	234	214	214	342	358	280	280	268	290	236	236
778	Cha-5	204	196	252	252	268	268	214	214	304	304	290	290	228	228	308	308	200	200	234	234	212	212	342	358	282	282	278	290	236	248
779	Cha-5	204	196	254	254	266	266	216	216	300	300	289	280	0	0	308	308	200	200	234	234	214	214	342	358	280	280	254	266	236	248
780	Cha-5	204	196	252	252	268	268	214	214	300	300	290	282	228	228	308	308	200	200	234	234	214	214	342	358	280	280	268	268	234	248
782	Cha-5	196	196	252	252	268	268	216	216	302	302	290	282	228	228	310	310	200	200	234	234	214	214	340	340	0	0	254	268	230	244
783	Cha-5	204	196	252	252	268	268	212	212	302	302	288	280	230	230	308	308	198	198	234	234	212	212	342	358	280	280	268	290	228	242
785	Cha-5	204	204	290	254	268	268	216	216	300	300	288	280	228	228	308	308	200	200	234	234	214	214	340	358	282	282	278	290	234	248
786	Cha-5	204	196	288	252	268	268	216	216	302	302	288	280	228	228	308	308	198	198	234	234	212	212	342	358	282	282	254	268	234	248
787	Cha-5	204	196	252	252	270	270	216	216	302	302	290	290	230	230	308	308	200	200	234	234	212	212	342	358	276	276	0	0	228	242
788	Cha-5	204	196	290	254	266	266	216	216	300	300	290	282	0	0	312	312	200	200	234	234	214	214	342	358	280	280	278	290	0	0
789	Cha-5	204	196	290	254	268	268	214	214	304	304	290	282	230	230	308	308	198	198	234	234	212	212	342	358	260	276	278	290	230	242
1	DAWU	204	196	290	254	268	268	216	216	302	302	286	278	230	230	312	312	200	200	234	234	214	214	350	350	280	266	290	276	246	234
2	DAWU	204	196	290	254	268	268	216	216	302	302	286	278	230	230	312	312	200	200	234	234	212	212	350	350	282	266	290	276	246	234
3	DAWU	204	196	290	254	268	268	216	216	302	302	286	278	230	230	312	312	200	200	234	234	212	212	350	350	280	266	290	276	246	234
4	DAWU	204	196	290	254	268	268	216	216	302	302	288	280	230	230	312	312	200	200	234	234	212	212	350	350	276	276	278	290	242	230
5	DAWU	204	196	252	252	268	268	216	216	302	302	288	280	230	230	312	312	200	200	234	234	212	212	350	350	276	276	278	290	230	230
6	DAWU	206	206	254	254	270	270	214	214	304	304	290	282	230	230	312	312	200	200	234	234	216	216	342	342	278	278	278	278	234	234
7	DAWU	204	196	290	254	268	268	214	214	302	302	290	282	230	230	312	312	200	200	234	234	216	216	342	342	280	280	278	290	236	236
8	DAWU	204	196	290	254	268	268	214	214	302	302	290	282	230	230	312	312	200	200	234	234	214	214	342	342	280	280	280	280	236	236
9	DAWU	204	204	290	254	268	268	214	214	300	300	288	280	230	230	312	312	200	200	234	234	214	214	342	342	276	300	274	280	234	234
10	DAWU	204	196	290	254	268	268	216	216	302	302	288	280	230	230	312	312	200	200	234	234	212	212	350	350	266	266	290	276	242	230
11	DAWU	204	196	252	252	268	268	216	216	302	302	288	280	230	230	312	312	200	200	234	234	212	212	350	350	280	280	290	276	230	230
12	DAWU	204	196	252	252	268	268	216	216	302	302	288	280	230	230	312	312	200	200	234	234	212	212	350	350	276	266	290	280	230	230
13	DAWU	204	196	252	252	270	270	216	216	302	302	288	280	230	230	312	312	200	200	234	234	212	212	350	350	276	276	290	280	230	230
16	DAWU	204	196	254	254	268	268	214	214	300	300	288	280	230	230	312	312	200	200	234	238	214	214	350	350	268	280	274	280	234	234
17	DAWU	204	196	254	254	268	268	214	214	300	300	288	290	230	230	312	312	200	200	234	234	214	214	350	350	268	280	276	276	234	234
18	DAWU	204	196	252	252	268	268	216	216	302	302	290	282	230	230	312	312	198	198	234	234	214	214	350	350	276	266	290	276	230	230
19	DAWU	204	196	288	252	270	270	214	214	302	302	288	280	230	230	312	312	200	200	238	234	212	212	350	350	276	276	290	276	230	230
20	DAWU	204	196	290	254	268	268	214	214	300	300	288	280	228	228	312	312	200	200	236	236	214	214	342	342	276	296	274	274	234	234
21	DAWU	204	196	288	252	268	268	216	216	302	302	288	280	230	230	312	312	200	200	234	234	212	212	350	350	276	276	290	274	230	230
22	DAWU	204	196	252	252	266	266	216	216	302	302	290	282	230	230	312	312	200	200	234	234	212	212	350	350	276	266	290	276	230	230
23	DAWU	204	196	254	254	268	268	214	214	300	300	288	280	228	228	310	310	200	200	236	236	214	214	342	342	268	296	268	280	234	234
24	DAWU	204	204	254	254	268	268	214	214	300	300	290	282	230	230	312	312	200	200	236	236	214	214	342	342	278	278	274	274	234	234
25	DAWU	204	196	290	254	0	0	214	214	300	300	290	282	230	230	312	312	200	200	236	238	214	214	342	358	266	276	278	278	228	228
26	DAWU	204	196	254	254	268	268	214	214	300	300	290	282	230	230	312	312	200	200	236	236	214	214	342	358	278	278	268	280	228	228
27	DAWU	204	196	290	254	266	266	214	214	302	302	290	282	230	230	312	312	200	200	234	238	216	216	350	350	0	0	280	268	242	230
28	DAWU	204	196	290	254	266	266	216	216	302	302	290	282	230	230	312	312	200	200	234	234	212	212	350	350	296	276	280	268	242	230
29	DAWU	204	196	290	254	266	266	216	216	302	302	288	280	230	230	312	312	200	200	234	234	218	218	350	350	296	276	280	280	234	234
30	DAWU	204	196	290	254	268	268	214	214	300	300	290	282	230	230	312	312	200	200	236	236	214	214	342	358	276	296	268	278	234	234
31	DAWU	204	196	290	254	266	266	216	216	302	302	286	278	230	230	312	312	200	200	238	234	214	214	350	350	296	276	278	268	242	230
32	DAWU	204	196	290	254	268	268	216	216	302	302	286	278	230	230	312	312	200	200	234	234	214	214	350	350	276	266	278	268	230	230
33	DAWU	204	196	290	254	266	266	216	216	302	302	286	278	230	230	312	312	200	200	236	236	218	214	350	350	276	266	278	268	230	230
34	DAWU	204	196	290	254	266	266	216	216	302	302	288	278	230	230	312	312	200	200	236	236	218	214	350	350	276	266	290	268	230	230
35	DAWU	204	196	290	254	270	270	216	216	302	302	286	278	230	230	312	312	200	200	236	236	218	218	350	350	276	266	268	268	230	230
36	DAWU	204	204	254	254	268	268	214	214	300	300	290	282	230	230	312	312	200	200	236	236	214	214	340	340	268	276	274	274	234	234
37	DAWU	204	196	254	254	268	268	214	214	300	300	290	282	230	230	312	312	200	200	236	236	214	214	342	342	266	276	276	276	230	230
38	DAWU	204	204	254	254	268	268	214	214	300	300	290	282	230	230	312	312	200	200	236	236	212	212	342	342	266	276	268	278	230	230
39	DAWU	204	196	290	254	266	266	216	216	302	302	286	278	230	230	312	312	200	200	234	234	212	212	350	350	276	276	296	280	230	230
40	DAWU	204	196	290	254	268	268	214	214	300	300	290	282	230	230	302	310	200	200	236	236	212	212	340	340	266	278	274	274	236	236
41	DAWU	204	196	290	254	268	268	214	214	300	300	290	282	230	230	312	312	200	200	236	236	214	214	342	342	278	280	278	278	236	236
42	DAWU	204	204	254	254	270	270	214	214	302	302	0	0	230	230	312	312	200	200	236	236	214	214	342	358	276	276	276	276	234	234
43	DAWU	204	204	254	254	270	270	214	214	302	302	290	282	230	230	312	312	200	200	236	236	214	214	342	358	276	276	276	276	234	234
44	DAWU	204	196	254	254	268	268	214	214	300	300	290	290	230	230	312	312	200	200	236	236	212	212	340	340	268	276	278	278	234	234
45	DAWU	204	196	254	254	270	270	216	216	302	302	286	278	230	230	312	312	200	200	234	234	218	214	338	338	276	266	290	276	230	230
46	DAWU	204	196	290	256	0	0	216	216	300	300	290	282	228	228	314	314	200	200	236	236	214	214	340	340	268	276	276	276	234	234
47	DAWU	204	196	290	256	268	268	216	216	300	300	288	280	228	228	314	314	200	200	236	236	214	214	340	340	266	278	274	274	234	234
48	DAWU	204	196	290	254	266	266	216	216	302	302	286	278	228	228	312	312	200	200	234	234	218	214	344	344	276	266	280	268	230	230
49	DAWU	204	196	254	254	268	268	216	216	302	302	286	278	228	228	312	312	200	200	238	234	218	218	344	344	276	276	290	276	234	228
50	DAWU	196	196	254	254	266	266	216	216	302	302	288	280	230	230	312	312	200	200	238	234	218	218	344	344	276	276	274	274	234	234
51	DAWU	204	196	290	254	268	268	216	216	302	302	286	278	228	228	312	312	200	200	234	234	218	218	344	344	276	266	290	268	242	230
53	DAWU	204	196	254	254	268	268	216	216	304	290	286	278	230	230	312	312	200	200	234	234	218	218	344	344	266	266	290	276	228	228
54	DAWU	196	196	290	254	268	268	216	216	302	302	288	280	228	228	312	312	200	200	234	234	218	218	342	342	276	276	290	274	230	230
55	DAWU	204	204	254	254	270	270	216	216	304	304	290	282	230	230	312	312	200	200	234	234	218	218	344	344	276	276	290	274	244	234
56	DAWU	204	196	290	256	268	268	216	216	302	302	288	280	228	228	314	314	200	200	236	236	214	214	342	342	266	276	278	278	234	234
57	DAWU	204	196	254	254	268	268	216	216	300	300	288	280	228	228	312	312	200	200	236	236	214	214	342	342	276	276	278	290	234	234
58	DAWU	204	196	254	254	268	268	216	216	300	300	288	280	228	228	312	312	200	200	236	236	214	214	342	342	276	276	268	268	236	236
59	DAWU	204	196	256	256	268	268	214	214	302	302	290	282	230	230	302	310	200	200	236	236	214	214	340	340	266	276	274	290	240	240
60	DAWU	204	196	290	254	268	268	214	214	302	302	288	280	230	230	312	312	198	198	234	234	212	212	340	340	280	278	290	274	230	230
61	DAWU	204	196	254	254	268	268	214	214	302	302	292	280	230	230	312	312	200	200	234	234	212	212	342	342	276	276	290	276	228	228
62	DAWU	204	196	254	254	268	268	214	214	302	302	288	280	230	230	312	312	200	200	234	234	214	214	342	342	276	276	290	276	228	228
63	DAWU	204	196	254	254	268	268	214	214	302	302	288	280	230	230	312	312	200	200	234	234	214	214	340	340	276	266	274	274	230	230
64	DAWU	204	196	290	254	268	268	214	214	302	302	288	280	230	230	312	312	200	200	234	234	214	214	340	340	276	266	290	274	230	230
65	DAWU	204	196	254	254	270	270	214	214	304	304	290	282	230	230	302	312	200	200	236	236	214	214	340	340	266	266	274	290	236	236
66	DAWU	204	196	254	254	270	270	216	216	300	300	288	280	230	230	312	312	200	200	234	234	214	214	342	342	276	276	278	278	234	234
67	DAWU	204	196	254	254	268	268	214	214	302	302	288	280	230	230	312	312	200	200	238	234	212	212	344	344	276	276	274	274	230	230
68	DAWU	204	196	290	254	268	268	214	214	302	302	286	278	230	230	312	312	200	200	234	234	212	212	342	342	278	278	290	276	242	230
69	DAWU	204	196	254	254	266	266	216	216	302	302	286	278	230	230	312	312	200	200	236	236	212	212	344	344	266	266	296	280	230	230
70	DAWU	204	196	254	254	268	268	214	214	302	302	286	278	230	230	312	312	200	200	238	236	212	212	342	342	276	266	290	278	230	230
71	DAWU	204	196	254	254	266	266	214	214	302	302	286	278	230	230	312	312	200	200	236	236	212	212	340	340	276	266	290	278	242	230
72	DAWU	204	196	254	254	268	268	216	216	302	302	286	278	230	230	312	312	200	200	236	236	218	218	344	344	276	276	278	268	228	228
73	DAWU	204	196	254	254	270	270	216	216	302	302	288	280	228	228	312	312	200	200	236	236	214	214	342	342	260	260	278	278	234	234
74	DAWU	204	196	254	254	266	266	216	216	302	302	288	278	230	230	310	310	200	200	236	236	212	212	350	350	268	260	290	278	230	230
75	DAWU	204	196	254	254	266	266	216	216	302	302	286	278	230	230	310	310	200	200	238	236	218	218	350	350	268	260	290	278	230	230
76	DAWU	204	196	290	254	268	268	216	216	298	298	288	280	228	228	312	312	200	200	236	236	214	214	342	342	260	260	274	274	234	234
77	DAWU	204	196	254	254	268	268	216	216	302	302	280	280	230	230	310	310	200	200	236	236	214	214	350	350	268	268	290	278	228	228
78	DAWU	204	196	252	252	266	266	214	214	302	302	288	280	230	230	310	310	200	200	236	236	0	0	350	350	268	268	290	276	210	210
79	DAWU	196	196	254	254	266	266	216	216	304	304	280	280	230	230	314	314	200	200	236	236	214	214	0	0	260	260	274	274	210	210
80	DAWU	196	196	254	254	270	270	216	216	302	302	280	280	230	230	310	310	198	198	238	234	214	214	0	0	260	260	274	274	230	230
81	DAWU	204	196	252	252	270	270	214	214	302	302	288	280	228	228	310	310	198	198	234	234	214	214	350	350	280	280	290	274	230	230
82	DAWU	204	196	290	252	268	268	214	214	302	302	288	280	230	230	310	310	200	200	236	236	212	212	350	350	260	260	290	274	228	228
83	DAWU	204	196	254	254	268	268	216	216	300	300	288	280	228	228	312	312	200	200	236	238	214	214	342	342	260	260	268	268	234	234
84	DAWU	204	204	254	254	268	268	216	216	300	300	290	290	228	228	314	314	200	200	236	238	214	214	342	342	266	266	274	290	230	230
85	DAWU	196	196	252	252	268	268	214	214	302	302	288	280	230	230	310	310	200	200	236	236	212	212	350	350	260	260	290	278	230	230
86	DAWU	204	196	254	254	266	266	214	214	302	302	290	282	230	230	310	310	200	200	236	236	214	214	350	350	260	260	296	280	230	230
87	DAWU	204	196	252	252	266	266	214	214	302	302	290	282	230	230	310	310	200	200	236	236	212	212	350	350	260	260	296	280	242	230
88	DAWU	204	196	254	254	268	268	216	216	298	298	290	282	228	228	314	314	200	200	236	238	214	214	342	342	266	266	274	290	234	234
89	DAWU	204	196	252	252	266	266	214	214	302	302	288	280	230	230	310	310	200	200	236	236	212	212	350	350	260	260	296	280	242	230
90	DAWU	204	196	254	254	268	268	216	216	300	300	290	282	228	228	314	314	200	200	236	238	214	214	342	342	266	266	276	290	234	234
91	DAWU	204	196	254	254	268	268	216	216	300	300	290	282	228	228	314	314	200	200	236	238	214	214	342	342	266	266	276	290	230	230
92	DAWU	204	196	290	252	266	266	214	214	302	302	288	280	230	230	310	310	200	200	236	236	212	212	350	350	260	260	296	280	228	228
93	DAWU	204	196	290	254	268	268	214	214	300	300	290	282	228	228	314	314	200	200	236	236	214	214	342	358	260	260	268	268	230	230
94	DAWU	204	196	290	252	266	266	214	214	302	302	288	280	230	230	310	310	200	200	236	236	214	214	350	350	276	276	296	280	246	234
95	DAWU	204	196	254	254	268	268	214	214	300	300	290	282	228	228	314	314	200	200	236	236	214	214	342	342	260	278	274	278	236	236
96	DAWU	204	204	254	254	268	268	216	216	302	302	290	290	230	230	0	0	200	200	236	236	214	214	358	358	268	278	276	276	0	0
97	DAWU	204	196	290	254	270	270	216	216	300	300	288	288	228	228	314	314	200	200	234	234	214	214	342	342	266	266	268	280	230	230
98	DAWU	204	196	290	254	270	270	214	214	302	302	290	282	228	228	302	312	200	200	236	236	214	214	340	340	266	266	276	290	230	230
99	DAWU	204	196	290	252	266	266	216	216	302	302	288	280	230	230	310	310	200	200	236	236	214	214	350	350	276	268	276	276	230	230
100	DAWU	204	196	256	256	266	266	216	216	302	302	290	280	228	228	310	310	200	200	236	236	214	214	350	350	266	266	290	276	230	230
101	DAWU	204	198	254	254	266	266	216	216	308	308	288	280	228	228	314	314	200	200	234	234	212	212	350	350	276	266	290	276	0	0
102	DAWU	204	196	290	256	266	266	214	214	306	306	288	280	228	228	314	314	200	200	234	234	212	212	340	340	266	266	274	274	242	230
103	DAWU	206	198	0	0	268	268	216	216	306	306	288	280	230	230	314	314	200	200	234	234	214	214	338	338	276	268	290	274	228	228
104	DAWU	196	196	252	252	266	266	214	214	304	304	288	280	228	228	312	312	200	200	236	236	218	212	344	344	276	276	290	274	242	230
105	DAWU	196	196	290	252	266	266	216	216	304	304	280	280	228	228	312	312	200	200	236	236	216	216	350	350	276	276	290	274	242	230
106	DAWU	204	196	0	0	270	270	216	216	302	302	288	280	230	230	286	286	200	200	238	234	214	214	344	344	276	276	290	276	228	228
107	DAWU	196	196	288	252	268	268	216	216	302	302	288	280	228	228	310	310	200	200	236	236	216	216	350	350	280	276	290	274	242	230
108	DAWU	196	196	252	252	266	266	214	214	302	302	288	280	230	230	310	310	200	200	236	236	216	216	350	350	280	266	290	276	234	228
109	DAWU	204	196	254	254	268	268	216	216	300	300	288	288	228	228	312	312	200	200	234	234	214	214	342	342	276	276	268	280	234	234
110	DAWU	204	196	288	252	268	268	214	214	302	302	288	280	228	228	310	310	200	200	236	236	216	216	350	350	280	280	290	274	234	228
111	DAWU	204	196	254	254	268	268	216	216	300	300	290	282	228	228	314	314	200	200	234	234	212	212	342	342	266	276	278	278	234	234
113	DAWU	204	196	288	252	268	268	214	214	302	302	290	290	230	230	310	310	200	200	236	236	218	218	350	350	266	266	280	268	228	228
114	DAWU	204	196	254	254	268	268	216	216	300	300	290	282	230	230	302	312	200	200	234	234	214	214	342	342	278	278	278	290	234	236
115	DAWU	204	204	254	254	268	268	216	216	300	300	290	282	230	230	302	312	200	200	234	234	214	214	342	342	276	276	276	276	234	234
116	DAWU	204	204	254	254	268	268	216	216	302	302	0	0	230	230	302	312	200	200	234	234	214	214	342	358	276	276	276	276	236	236
117	DAWU	204	196	252	252	268	268	216	216	302	302	290	282	228	228	310	310	200	200	236	236	218	218	350	350	276	266	280	268	228	228
118	DAWU	196	196	254	254	268	268	216	216	302	302	290	282	230	230	312	312	200	200	234	234	214	214	342	358	266	276	276	276	234	234
119	DAWU	206	206	254	254	268	268	216	216	302	302	288	280	230	230	302	310	200	200	234	234	214	214	342	358	0	0	276	276	234	234
120	DAWU	204	196	254	254	268	268	216	216	302	302	290	282	230	230	302	312	200	200	234	234	214	214	342	358	0	0	276	276	234	234
121	DAWU	204	196	254	254	268	268	216	216	300	300	290	282	228	228	302	312	200	200	234	234	214	214	342	342	276	276	280	290	234	234
122	DAWU	196	196	246	246	268	268	216	216	302	302	290	282	230	230	314	314	200	200	234	234	214	214	338	338	276	276	290	274	228	228
123	DAWU	0	0	254	254	0	0	216	216	300	300	290	282	230	230	302	312	200	200	234	234	214	214	342	358	266	266	274	280	236	236
124	DAWU	196	196	252	252	266	266	214	214	302	302	290	282	230	230	314	314	200	200	236	236	212	212	350	350	266	266	290	274	228	228
125	DAWU	206	206	290	254	268	268	214	214	300	300	290	282	230	230	302	312	200	200	234	234	214	214	342	342	266	266	278	278	234	234
126	DAWU	204	196	288	252	268	268	214	214	304	304	290	282	230	230	314	314	200	200	236	236	214	214	350	350	266	266	290	276	228	228
127	DAWU	204	196	252	252	268	268	214	214	302	302	290	282	228	228	312	312	200	200	238	236	214	214	350	350	276	266	290	274	242	230
128	DAWU	204	196	288	252	266	266	214	214	302	302	288	280	230	230	312	312	200	200	236	236	212	212	350	350	282	282	290	274	234	228
129	DAWU	196	196	252	252	266	266	214	214	302	302	290	282	230	230	314	314	200	200	236	236	212	212	350	350	276	276	290	276	242	230
130	DAWU	196	196	252	252	266	266	214	214	302	302	290	282	228	228	314	314	200	200	236	236	212	212	350	350	276	276	290	276	242	228
131	DAWU	204	196	290	254	268	268	214	214	300	300	290	282	230	230	312	312	200	200	236	236	212	212	342	342	276	276	278	278	234	234
132	DAWU	204	196	290	254	268	268	214	214	302	302	282	290	230	230	302	312	200	200	236	236	212	212	342	358	276	276	276	290	234	234
133	DAWU	204	196	254	254	268	268	214	214	302	302	282	290	230	230	302	312	200	200	236	236	212	212	342	342	276	276	276	276	234	234
134	DAWU	204	196	252	252	266	266	214	214	306	306	290	282	228	228	314	314	200	200	236	236	212	212	350	350	276	276	290	276	242	230
136	DAWU	204	196	254	254	266	266	214	214	304	304	288	280	228	228	314	314	200	200	236	236	212	212	350	350	276	276	290	276	230	230
138	DAWU	204	204	254	254	268	268	214	214	302	302	290	290	230	230	302	312	200	200	236	236	212	212	342	342	276	276	276	276	230	230
139	DAWU	204	196	254	254	266	266	214	214	304	304	288	280	228	228	312	312	200	200	236	236	212	212	350	350	276	266	290	274	230	230
140	DAWU	204	196	254	254	266	266	214	214	304	304	288	280	228	228	312	312	200	200	236	236	212	212	350	350	276	266	290	274	230	230
141	DAWU	196	196	254	254	268	268	214	214	304	304	288	280	228	228	312	312	200	200	236	236	218	214	350	350	276	266	290	274	230	230
142	DAWU	204	196	254	254	268	268	214	214	304	304	288	280	228	228	312	312	200	200	236	236	212	212	350	350	276	266	290	274	230	230
143	DAWU	204	196	254	254	268	268	216	216	304	304	288	280	228	228	312	312	200	200	236	236	212	212	350	350	278	266	290	274	230	230
144	DAWU	204	196	254	254	268	268	216	216	304	304	290	282	228	228	312	312	200	200	236	236	212	212	350	350	276	276	290	278	228	228
145	DAWU	204	196	290	256	268	268	214	214	304	304	290	282	228	228	312	312	200	200	234	234	212	212	350	350	276	276	280	268	234	234
146	DAWU	204	196	254	254	268	268	214	214	302	302	290	282	230	230	312	312	200	200	234	234	212	212	342	342	288	276	290	276	228	228
147	DAWU	204	196	288	254	268	268	214	214	302	302	290	282	230	230	312	312	200	200	236	236	212	212	342	342	276	266	290	276	244	234
148	DAWU	204	196	288	254	268	268	214	214	302	302	290	282	230	230	310	310	200	200	236	236	212	212	340	340	276	266	280	268	230	230
149	DAWU	204	196	290	254	268	268	214	214	302	302	282	290	228	228	302	312	200	200	236	236	212	212	342	342	276	276	278	290	234	234
151	DAWU	204	196	254	254	268	268	214	214	302	302	290	282	230	230	308	308	200	200	236	236	212	212	342	342	266	266	290	274	230	230
152	DAWU	204	196	254	254	268	268	214	214	300	300	290	282	230	230	310	310	200	200	236	236	212	212	350	350	276	266	274	274	230	230
153	DAWU	204	196	254	254	268	268	214	214	302	302	282	290	230	230	302	310	200	200	236	236	212	212	342	342	266	276	274	280	234	234
154	DAWU	204	196	290	254	268	268	214	214	302	302	288	280	230	230	310	310	200	200	236	236	212	212	350	350	266	266	290	278	242	230
155	DAWU	204	196	252	252	268	268	216	216	302	302	288	280	230	230	310	310	200	200	234	234	212	212	350	350	276	266	290	276	230	230
156	DAWU	204	196	288	254	266	266	216	216	302	302	288	280	230	230	310	310	200	200	238	234	212	212	350	350	276	266	290	276	230	230
157	DAWU	204	196	252	252	266	266	216	216	302	302	288	280	228	228	310	310	200	200	236	236	212	212	350	350	266	266	290	276	244	234
158	DAWU	204	196	288	252	266	266	216	216	302	302	288	280	230	230	310	310	200	200	236	236	212	212	350	350	276	266	290	278	230	230
159	DAWU	204	196	288	252	266	266	216	216	302	302	288	280	230	230	312	312	200	200	234	234	212	212	350	350	276	266	290	278	248	236
160	DAWU	204	196	290	254	268	268	214	214	302	302	282	290	230	230	302	312	200	200	236	236	212	212	342	358	266	276	274	274	230	230
161	DAWU	204	196	252	252	266	266	216	216	306	306	288	280	228	228	312	312	200	200	234	234	212	212	350	350	276	266	290	276	230	230
162	DAWU	204	196	254	254	268	268	216	216	302	302	282	290	230	230	312	312	198	198	236	236	216	216	342	358	276	276	274	274	0	0
163	DAWU	204	196	290	254	268	268	216	216	300	300	282	290	230	230	302	312	200	200	236	236	214	214	342	342	266	276	274	290	236	236
164	DAWU	204	196	254	254	268	268	216	216	300	300	282	290	230	230	312	312	200	200	236	236	214	214	340	358	276	276	274	290	234	234
165	DAWU	204	196	304	256	268	268	214	214	302	302	282	290	228	228	312	312	200	200	236	236	214	214	340	340	268	276	278	290	234	234
166	DAWU	204	196	254	254	266	266	214	214	302	302	290	290	230	230	312	312	200	200	234	234	212	212	350	350	276	276	278	278	242	230
167	DAWU	204	196	256	256	268	268	214	214	302	302	282	290	228	228	312	312	200	200	236	236	214	214	340	340	268	276	280	290	234	234
168	DAWU	204	196	290	256	268	268	214	214	302	302	282	290	228	228	312	312	198	198	236	236	214	214	342	342	276	276	276	290	234	236
169	DAWU	204	198	290	254	266	266	214	214	304	304	290	280	230	230	312	312	200	200	234	234	212	212	350	350	276	276	278	278	230	230
170	DAWU	204	196	254	254	266	266	214	214	304	304	290	282	230	230	312	312	200	200	234	234	212	212	350	350	276	276	276	276	242	230
171	DAWU	204	196	290	254	268	268	214	214	302	302	282	290	228	228	302	312	200	200	236	236	214	214	342	342	266	276	278	290	234	234
172	DAWU	204	196	290	254	266	266	214	214	304	304	288	280	230	230	312	312	200	200	234	234	212	212	350	350	276	268	278	278	244	234
173	DAWU	204	196	290	254	268	268	214	214	302	302	282	290	228	228	302	312	200	200	236	236	214	214	342	342	276	276	278	278	236	236
174	DAWU	204	196	290	254	268	268	214	214	302	302	282	290	228	228	302	312	200	200	236	236	214	214	342	342	266	266	278	290	236	236
175	DAWU	204	196	290	254	268	268	214	214	302	302	282	290	228	228	302	312	200	200	236	236	214	214	342	342	276	276	276	276	236	236
176	DAWU	204	196	290	254	266	266	214	214	306	306	288	280	228	228	310	310	200	200	234	234	212	212	350	350	280	280	276	276	242	230
177	DAWU	204	196	290	252	266	266	214	214	304	304	288	280	230	230	312	312	200	200	234	234	212	212	350	350	278	260	280	268	242	228
178	DAWU	204	196	254	254	268	268	214	214	302	302	282	290	228	228	302	312	200	200	236	236	212	212	342	342	266	276	266	280	234	234
179	DAWU	204	196	290	252	266	266	214	214	304	304	288	280	228	228	310	310	200	200	234	234	212	212	350	350	280	278	274	274	242	230
180	DAWU	204	196	290	252	266	266	214	214	302	302	288	280	230	230	312	312	200	200	234	234	212	212	350	350	276	266	280	268	234	234
181	DAWU	204	196	290	252	266	266	214	214	300	300	290	282	230	230	312	312	200	200	234	234	212	212	350	350	266	266	274	274	228	228
182	DAWU	204	196	288	252	266	266	214	214	300	300	290	282	230	230	310	310	200	200	234	234	214	214	350	350	276	266	290	274	230	230
183	DAWU	204	196	254	254	268	268	214	214	302	302	282	290	228	228	312	312	200	200	236	236	212	212	342	342	276	276	274	274	236	236
184	DAWU	204	196	290	252	266	266	214	214	302	302	290	282	230	230	312	312	200	200	234	234	212	212	350	350	280	266	290	274	230	230
185	DAWU	204	196	290	252	268	268	214	214	302	302	290	282	230	230	312	312	200	200	234	234	212	212	350	350	276	266	290	274	242	230
186	DAWU	204	196	290	252	266	266	214	214	300	300	290	282	230	230	312	312	200	200	234	234	212	212	350	350	276	266	274	274	230	230
187	DAWU	204	196	290	252	266	266	214	214	300	300	288	280	228	228	312	312	200	200	236	236	212	212	350	350	276	276	274	274	244	234
188	DAWU	204	196	254	254	268	268	214	214	302	302	282	290	228	228	302	312	200	200	236	236	212	212	342	342	266	276	274	274	236	236
189	DAWU	204	196	252	252	266	266	214	214	300	300	288	280	228	228	312	312	200	200	236	236	214	214	350	350	276	276	276	276	244	234
190	DAWU	204	196	290	252	266	266	214	214	302	302	288	280	228	228	312	312	200	200	236	236	216	216	350	350	276	276	278	278	230	230
191	DAWU	204	196	254	254	266	266	214	214	300	300	288	280	230	230	312	312	200	200	236	236	214	214	350	350	276	276	278	278	242	230
192	DAWU	204	196	254	254	268	268	214	214	302	302	290	282	228	228	302	312	200	200	236	236	212	212	342	342	260	276	254	268	236	236
193	DAWU	204	204	290	254	266	266	214	214	300	300	288	280	230	230	312	312	200	200	236	236	216	216	350	350	276	276	276	276	230	230
194	DAWU	204	204	254	254	266	266	214	214	306	306	288	280	230	230	314	314	200	200	236	236	214	214	350	350	276	276	276	276	230	230
195	DAWU	204	196	254	254	268	268	214	214	302	302	290	282	228	228	302	312	200	200	236	236	212	212	342	342	276	276	254	274	234	234
196	DAWU	204	196	254	254	270	270	214	214	302	302	290	282	228	228	302	312	200	200	236	236	212	212	340	358	276	276	254	268	236	236
197	DAWU	204	196	252	252	266	266	214	214	298	298	288	280	230	230	314	314	200	200	236	236	214	214	350	350	276	260	274	274	244	234
198	DAWU	204	196	254	254	266	266	214	214	300	300	288	280	228	228	312	312	200	200	236	236	214	214	350	350	276	276	274	254	230	230
199	DAWU	204	204	254	254	266	266	214	214	300	300	286	278	230	230	312	312	200	200	236	236	214	214	350	350	276	276	274	254	230	230
200	DAWU	204	196	254	254	266	266	216	216	300	300	286	278	230	230	312	312	200	200	236	236	214	214	350	350	274	274	280	274	244	234
201	DAWU	204	196	254	254	266	266	214	214	300	300	288	280	230	230	312	312	200	200	236	236	214	214	350	350	274	274	290	274	228	228
202	DAWU	204	196	288	254	266	266	214	214	300	300	288	280	230	230	312	312	200	200	236	236	214	214	350	350	274	274	274	274	242	230
203	DAWU	204	196	288	252	266	266	214	214	300	300	288	280	230	230	310	310	200	200	236	236	214	214	350	350	274	274	274	274	228	228
204	DAWU	204	196	288	252	266	266	214	214	302	302	286	278	230	230	312	312	200	200	236	236	212	212	350	350	280	266	274	274	242	228
205	DAWU	204	196	290	254	270	270	214	214	302	302	290	282	228	228	302	312	200	200	236	238	214	214	340	340	260	268	276	276	234	240
206	DAWU	204	196	288	252	268	268	214	214	302	302	288	280	230	230	312	312	200	200	236	236	212	212	350	350	274	274	276	276	242	228
207	DAWU	204	196	254	254	268	268	214	214	300	300	288	280	230	230	310	310	200	200	236	236	214	214	350	350	274	274	276	276	230	230
208	DAWU	204	196	290	254	268	268	214	214	302	302	290	282	228	228	312	312	198	198	236	236	212	212	340	340	268	268	274	290	234	234
209	DAWU	204	196	290	252	266	266	214	214	300	300	290	282	230	230	312	312	200	200	236	236	214	214	350	350	266	266	274	274	230	230
210	DAWU	204	196	288	252	266	266	214	214	302	302	290	282	230	230	312	312	200	200	236	236	214	214	350	350	276	276	274	274	230	230
211	DAWU	204	196	290	254	268	268	214	214	300	300	290	282	228	228	302	310	200	200	236	236	212	212	340	340	278	280	274	274	234	234
212	DAWU	204	196	254	254	268	268	214	214	300	300	290	282	228	228	302	310	200	200	236	236	212	212	340	340	278	280	276	276	234	234
213	DAWU	204	196	290	254	270	270	216	216	300	300	290	282	228	228	302	310	200	200	236	236	212	212	340	340	268	276	276	276	236	236
214	DAWU	204	196	290	254	268	268	216	216	300	300	290	282	228	228	302	310	200	200	236	236	212	212	340	358	278	280	276	276	234	234
215	DAWU	204	196	256	256	268	268	216	216	302	302	290	282	230	230	312	312	200	200	236	236	212	212	340	340	278	280	274	274	236	236
216	DAWU	204	196	256	256	268	268	216	216	302	302	290	282	230	230	302	312	200	200	236	236	212	212	340	340	278	280	274	274	234	234
217	DAWU	204	196	254	254	268	268	214	214	302	302	290	282	230	230	302	312	200	200	236	236	212	212	340	340	278	278	268	268	230	230
218	DAWU	204	196	288	252	266	266	214	214	304	304	288	280	228	228	312	312	198	198	236	236	214	214	350	350	280	276	274	274	244	234
219	DAWU	204	196	290	254	268	268	214	214	300	300	290	282	230	230	302	310	200	200	236	236	212	212	340	340	278	280	274	290	236	236
220	DAWU	204	196	254	254	266	266	214	214	306	306	288	280	230	230	312	312	200	200	236	236	214	214	0	0	280	266	274	274	244	234
221	DAWU	204	196	252	252	266	266	214	214	302	302	288	278	230	230	312	312	198	198	236	236	214	214	350	350	280	276	268	268	242	230
222	DAWU	204	196	254	254	266	266	214	214	306	306	288	278	230	230	312	312	200	200	236	236	214	214	338	338	280	276	274	274	0	0
223	DAWU	204	196	254	254	266	266	214	214	304	304	288	278	230	230	312	312	200	200	236	236	212	212	350	350	282	282	276	276	234	234
224	DAWU	204	196	0	0	266	266	214	214	300	300	288	278	230	230	314	314	200	200	236	236	218	218	350	350	266	266	276	276	230	230
225	DAWU	204	196	254	254	266	266	214	214	306	306	288	278	228	228	312	312	200	200	236	236	216	216	350	350	276	266	274	274	244	234
226	DAWU	204	196	254	254	266	266	214	214	306	306	288	280	228	228	312	312	200	200	236	236	214	214	350	350	280	266	274	274	242	230
227	DAWU	204	196	254	254	266	266	214	214	300	300	288	278	228	228	312	312	200	200	236	236	214	214	350	350	266	266	274	274	242	230
228	DAWU	204	196	254	254	266	266	214	214	306	306	288	278	228	228	312	312	200	200	236	236	212	212	350	350	266	266	276	276	230	230
229	DAWU	204	196	252	252	266	266	214	214	306	306	288	278	228	228	312	312	200	200	236	236	212	212	350	350	266	266	274	274	242	230
230	DAWU	204	196	252	252	266	266	214	214	298	298	288	278	228	228	310	310	200	200	236	236	214	214	350	350	266	266	290	274	230	230
232	DAWU	204	196	290	252	266	266	214	214	300	300	288	278	228	228	310	310	200	200	236	236	214	214	350	350	276	266	278	278	242	230
A1	DL	204	196	252	252	266	266	214	214	306	306	288	280	228	228	310	310	200	200	236	236	212	212	344	344	276	266	276	254	230	230
A10	DL	204	196	256	256	268	268	214	214	300	300	280	280	228	228	312	312	200	200	236	236	214	214	350	350	276	276	276	276	234	234
A11	DL	204	196	254	254	268	268	214	214	304	304	292	280	228	228	312	312	200	200	236	236	212	212	350	350	276	260	276	276	234	234
A12	DL	204	196	256	256	268	268	214	214	304	304	288	280	228	228	312	312	200	200	236	236	212	212	350	350	266	266	290	274	234	234
A13	DL	204	196	254	254	266	266	214	214	302	302	288	280	228	228	312	312	200	200	236	236	212	212	350	350	274	274	274	274	242	230
A14	DL	204	196	254	254	266	266	214	214	300	300	292	280	228	228	312	312	200	200	236	236	0	0	350	350	276	266	274	274	230	230
A15	DL	204	204	254	254	266	266	214	214	304	304	292	280	228	228	312	312	200	200	236	236	212	212	350	350	276	266	274	254	242	230
A16	DL	204	196	252	252	266	266	214	214	304	304	292	280	228	228	312	312	200	200	236	236	0	0	350	350	274	274	268	268	242	230
A17	DL	204	196	252	252	266	266	214	214	302	302	292	280	228	228	312	312	200	200	236	236	214	214	350	350	276	266	290	266	244	234
A2	DL	204	196	252	252	266	266	214	214	300	300	288	280	228	228	310	310	200	200	236	236	212	212	350	350	276	276	260	260	230	230
A3	DL	204	196	252	252	266	266	214	214	306	306	292	280	228	228	310	310	200	200	236	236	212	212	350	350	276	276	276	276	242	230
A4	DL	204	196	252	288	0	0	214	214	304	304	292	280	230	230	310	310	200	200	236	236	212	212	350	350	276	266	276	276	244	234
A5	DL	204	196	252	252	268	268	214	214	304	304	292	280	230	230	310	310	200	200	236	236	212	212	350	350	266	266	274	254	242	230
A6	DL	204	196	252	252	268	268	214	214	300	300	292	280	228	228	310	310	200	200	236	236	212	212	350	350	266	266	268	268	230	230
A7	DL	204	196	252	252	268	268	214	214	304	304	292	280	228	228	310	310	200	200	236	236	0	0	350	350	276	276	290	274	234	234
A8	DL	204	196	252	252	266	266	214	214	300	300	292	280	228	228	310	310	200	200	236	236	212	212	350	350	276	266	276	276	234	234
A9	DL	204	196	254	254	268	268	214	214	304	304	292	280	228	228	310	310	200	200	236	236	212	212	350	350	276	276	274	254	234	234
B100	DL	204	196	254	254	268	268	214	214	304	304	292	280	230	230	314	314	0	0	234	234	214	214	350	350	276	276	276	276	230	230
B88	DL	204	196	252	252	266	266	214	214	306	306	292	280	228	228	312	312	200	200	236	236	214	214	350	350	278	278	290	290	242	230
B89	DL	204	196	252	252	266	266	214	214	300	300	292	280	228	228	312	312	200	200	236	236	214	214	350	350	266	266	290	274	242	230
B90	DL	204	196	288	252	266	266	214	214	306	306	292	280	228	228	310	310	200	200	236	236	214	214	350	350	266	266	290	268	230	230
B91	DL	204	196	252	252	268	268	214	214	306	306	292	280	228	228	312	312	200	200	236	236	214	214	350	350	276	276	266	266	230	230
B92	DL	204	196	252	252	268	268	214	214	306	306	292	280	228	228	312	312	200	200	236	236	214	214	350	350	276	276	254	254	230	230
B93	DL	204	196	288	252	268	268	214	214	306	306	292	280	230	230	312	312	200	200	236	236	214	214	342	342	266	266	266	266	244	234
B94	DL	204	196	256	256	268	268	214	214	306	306	292	280	230	230	312	312	0	0	236	236	214	214	342	342	276	266	268	254	230	230
B95	DL	204	196	288	252	266	266	214	214	302	302	292	280	230	230	312	312	200	200	238	236	218	218	350	350	276	276	266	266	230	230
B96	DL	204	196	252	252	266	266	214	214	304	304	292	280	230	230	312	312	200	200	234	234	0	0	350	350	278	278	274	274	244	234
B97	DL	204	196	252	252	266	266	214	214	304	304	290	280	230	230	312	312	200	200	234	234	214	214	350	350	276	276	290	274	230	230
B98	DL	204	196	252	252	266	266	214	214	300	300	290	280	230	230	312	312	200	200	234	234	214	214	350	350	276	276	290	274	230	230
B99	DL	204	196	252	252	266	266	214	214	300	300	290	280	230	230	314	314	200	200	234	234	214	214	350	350	276	266	274	254	230	230
C1	DL	204	196	254	254	266	266	214	214	300	300	290	280	228	228	314	314	200	200	234	234	214	214	350	350	276	276	290	268	244	234
C10	DL	204	196	252	252	268	268	214	214	300	300	292	280	230	230	314	314	200	200	236	236	212	212	350	350	260	260	274	274	242	230
C11	DL	204	198	252	252	270	270	214	214	304	304	292	280	230	230	314	314	200	200	236	236	218	214	350	350	266	266	268	254	230	230
C12	DL	204	196	254	254	266	266	214	214	300	300	292	280	230	230	314	314	0	0	236	236	214	214	350	350	266	266	290	274	242	230
C13	DL	204	196	252	252	268	268	214	214	300	300	292	280	230	230	312	312	200	200	236	236	214	214	350	350	276	276	260	260	230	230
C14	DL	204	196	252	252	268	268	214	214	298	298	292	280	230	230	312	312	200	200	236	236	214	214	350	350	276	266	266	266	242	230
C15	DL	204	196	252	252	270	270	214	214	300	300	292	280	230	230	312	312	200	200	236	236	214	214	350	350	268	266	260	260	230	230
C16	DL	204	196	254	254	270	270	214	214	304	304	292	280	230	230	312	312	200	200	236	236	214	214	350	350	276	276	290	274	234	234
C17	DL	204	196	252	252	270	270	214	214	300	300	292	280	230	230	312	312	200	200	236	236	214	214	350	350	276	276	274	254	234	234
C18	DL	204	196	252	252	270	270	214	214	300	300	292	280	230	230	312	312	200	200	236	236	214	214	350	350	276	266	280	268	244	234
C19	DL	204	196	290	254	268	268	214	214	300	300	292	280	228	228	312	312	200	200	234	234	0	0	350	350	276	266	290	290	244	236
C2	DL	204	196	254	254	266	266	214	214	300	300	290	280	228	228	314	314	200	200	234	234	0	0	350	350	276	266	274	274	242	230
C20	DL	204	196	254	254	268	268	214	214	300	300	292	280	230	230	312	312	200	200	234	234	218	214	350	350	276	276	268	268	242	230
C21	DL	196	196	290	254	268	268	214	214	300	300	290	282	230	230	312	312	200	200	234	234	212	212	350	350	280	268	274	254	244	234
C22	DL	204	196	254	254	268	268	214	214	300	300	292	280	230	230	312	312	200	200	234	234	212	212	344	344	280	266	274	254	242	228
C23	DL	196	196	254	254	268	268	214	214	300	300	292	280	230	230	312	312	200	200	234	234	212	212	344	344	266	266	274	274	230	230
C24	DL	204	196	254	254	268	268	214	214	300	300	292	280	230	230	312	312	200	200	234	234	212	212	344	344	276	276	296	280	230	230
C25	DL	204	196	254	254	268	268	214	214	300	300	292	280	230	230	312	312	200	200	234	234	212	212	344	344	276	266	274	274	230	230
C26	DL	204	196	252	252	268	268	216	216	300	300	290	290	230	230	312	312	200	200	236	236	212	212	344	344	276	268	274	274	228	228
C27	DL	204	196	254	254	268	268	216	216	302	302	290	290	230	230	312	312	200	200	236	236	214	214	344	344	276	276	274	274	236	228
C28	DL	204	196	288	252	268	268	216	216	300	300	288	278	230	230	312	312	200	200	236	236	212	212	350	350	276	266	290	278	228	228
C29	DL	204	196	254	254	270	270	216	216	300	300	292	280	230	230	310	310	200	200	236	236	218	214	338	338	282	282	290	276	236	226
C3	DL	204	196	254	254	266	266	214	214	302	302	290	280	228	228	314	314	200	200	234	234	212	212	350	350	280	280	274	274	230	230
C30	DL	204	196	252	252	268	268	216	216	300	300	292	280	230	230	310	310	200	200	236	236	214	214	350	342	0	0	274	274	228	228
C31	DL	204	196	254	254	266	266	216	216	300	300	292	280	230	230	310	310	200	200	234	234	218	214	344	344	276	266	276	276	242	230
C32	DL	204	196	252	252	266	266	216	216	300	300	292	280	230	230	310	310	200	200	236	236	214	214	344	344	280	268	290	276	236	226
C33	DL	204	198	288	252	266	266	216	216	300	300	292	280	230	230	310	310	200	200	236	236	218	218	0	0	276	276	276	276	234	234
C34	DL	204	196	252	252	266	266	216	216	300	300	292	280	228	228	310	310	200	200	236	236	214	214	350	350	276	276	290	274	230	230
C35	DL	204	196	290	254	266	266	216	216	300	300	292	280	228	228	310	310	200	200	236	236	214	214	342	342	266	266	290	276	242	230
C36	DL	204	196	254	254	266	266	216	216	300	300	292	280	228	228	310	310	200	200	236	236	214	214	350	350	276	266	276	254	242	230
C37	DL	204	196	254	254	266	266	216	216	300	300	292	280	228	228	310	310	200	200	238	236	214	214	338	338	276	266	274	254	230	230
C4	DL	204	196	254	254	268	268	214	214	302	302	288	278	228	228	314	314	198	198	234	234	212	212	338	338	260	260	268	268	242	230
C5	DL	204	196	254	254	268	268	214	214	302	302	288	278	228	228	314	314	198	198	234	234	212	212	350	350	276	266	290	290	242	230
C6	DL	204	196	254	254	268	268	214	214	302	302	290	280	228	228	314	314	0	0	234	234	212	212	344	344	280	280	274	254	230	230
C7	DL	204	196	254	254	268	268	214	214	302	302	290	280	228	228	314	314	200	200	236	236	212	212	350	350	276	260	274	254	242	228
C8	DL	204	196	254	254	266	266	214	214	300	300	290	280	228	228	314	314	200	200	234	234	212	212	350	350	276	266	274	274	242	230
C9	DL	204	196	288	252	266	266	214	214	300	300	292	280	230	230	314	314	0	0	236	236	212	212	350	350	276	276	274	274	242	228
